# Supplementary material for: Expression and functional assessment of candidate type 2 diabetes susceptibility genes identify four new genes contributing to human insulin secretion
Source: PubMed Central journal article supplement — Mol Metab. 2017 Apr 8;6(6):459–70. doi: 10.1016/j.molmet.2017.03.011 (PMC5444093; doi:10.1016/j.molmet.2017.03.011), 2017-04-08
Supplement: mmc1.pdf [file mmc1.pdf]

**Figure A. Heat map representing the expression of each T2D-susceptibility gene in the panel of human organs, tissues and cells.**

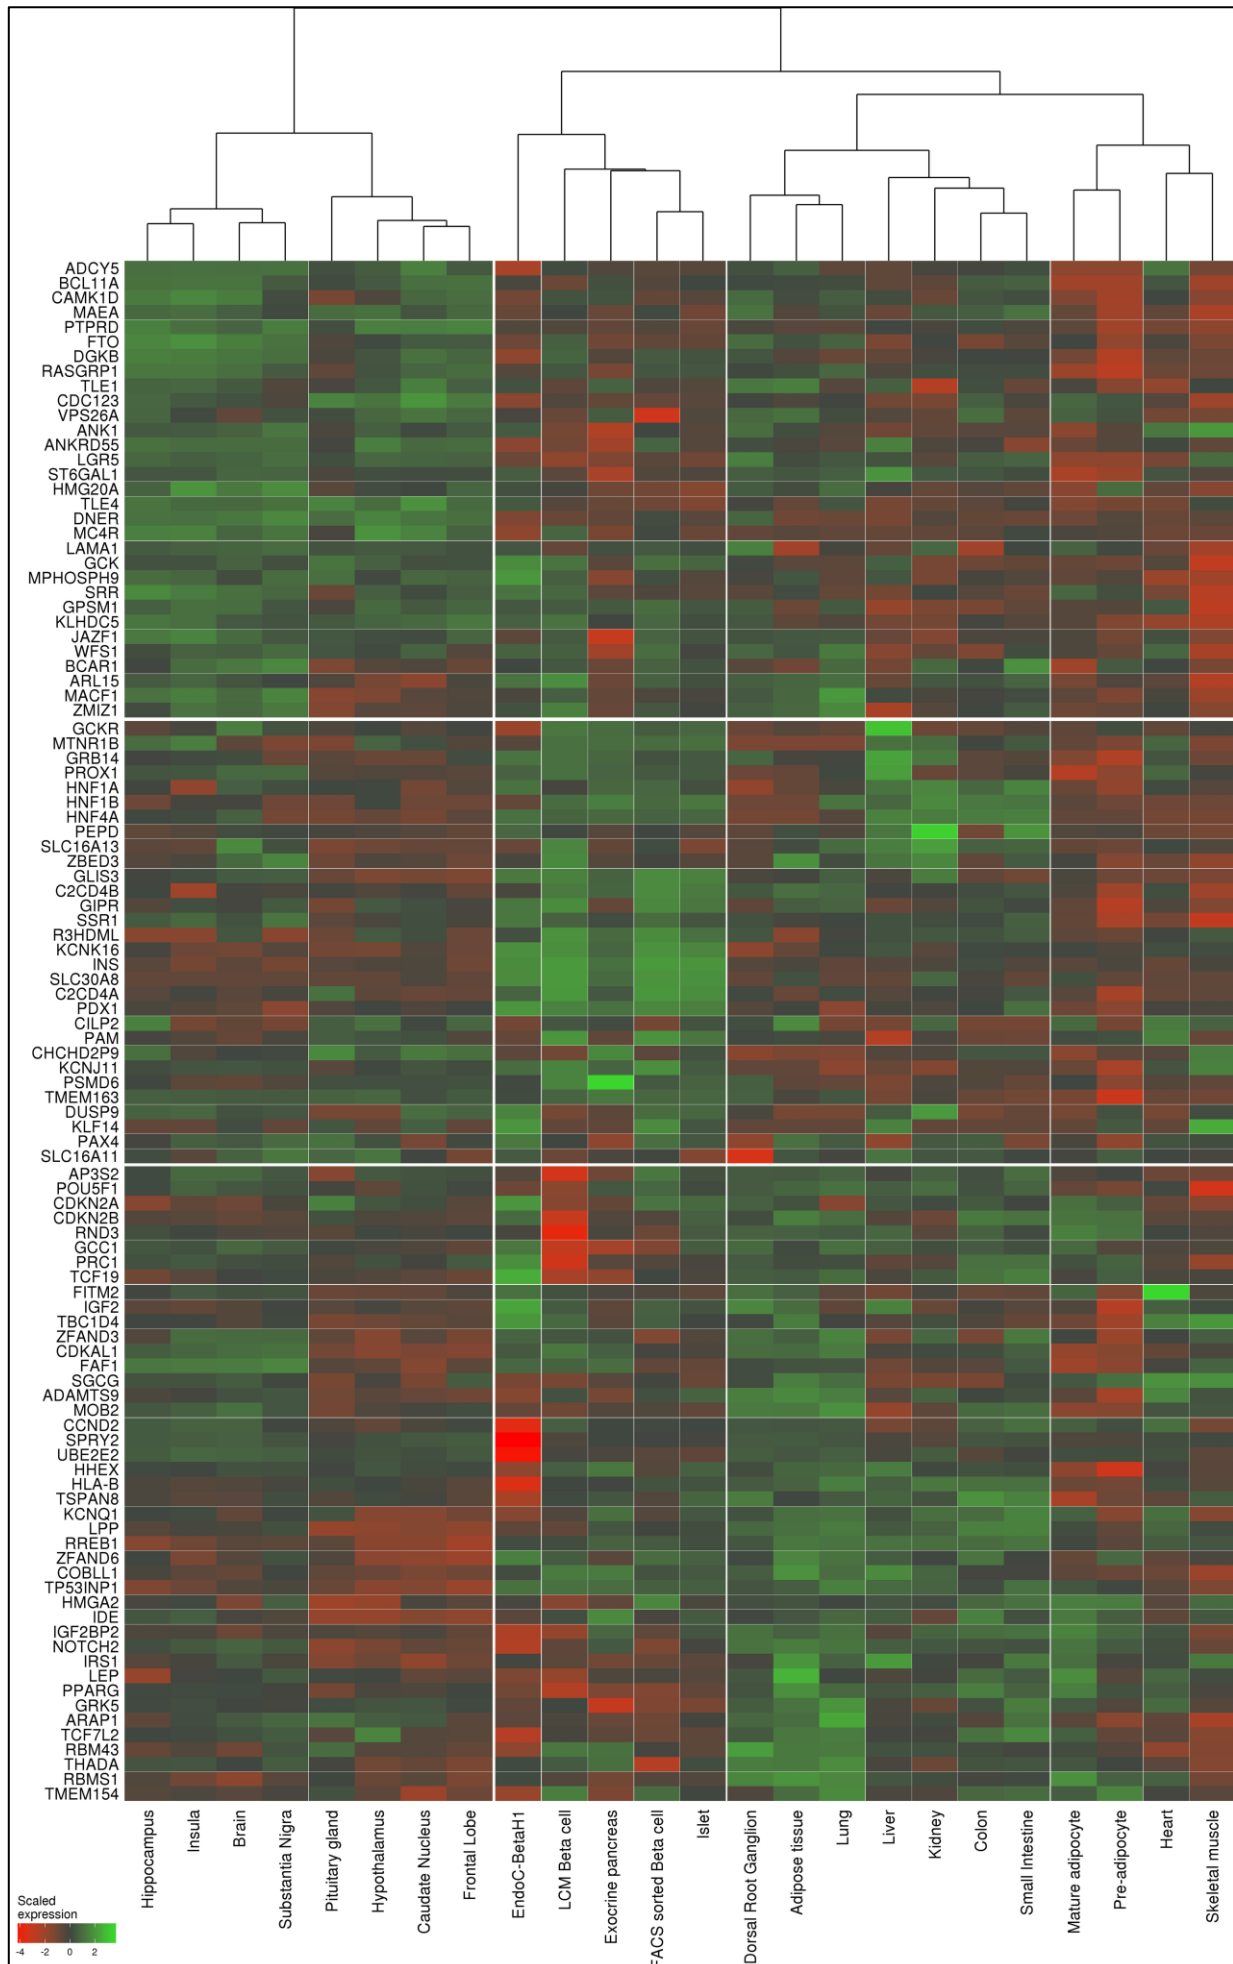

**Figure B. (1) Heat map representing the expression of three genes known to be highly expressed in gut in the panel of human organs, tissues and cells; (2) Enrichment analysis of gut markers expression in the panel of human organs, tissues and cells. The black vertical line denotes a  $p$ -value of 0.05.**

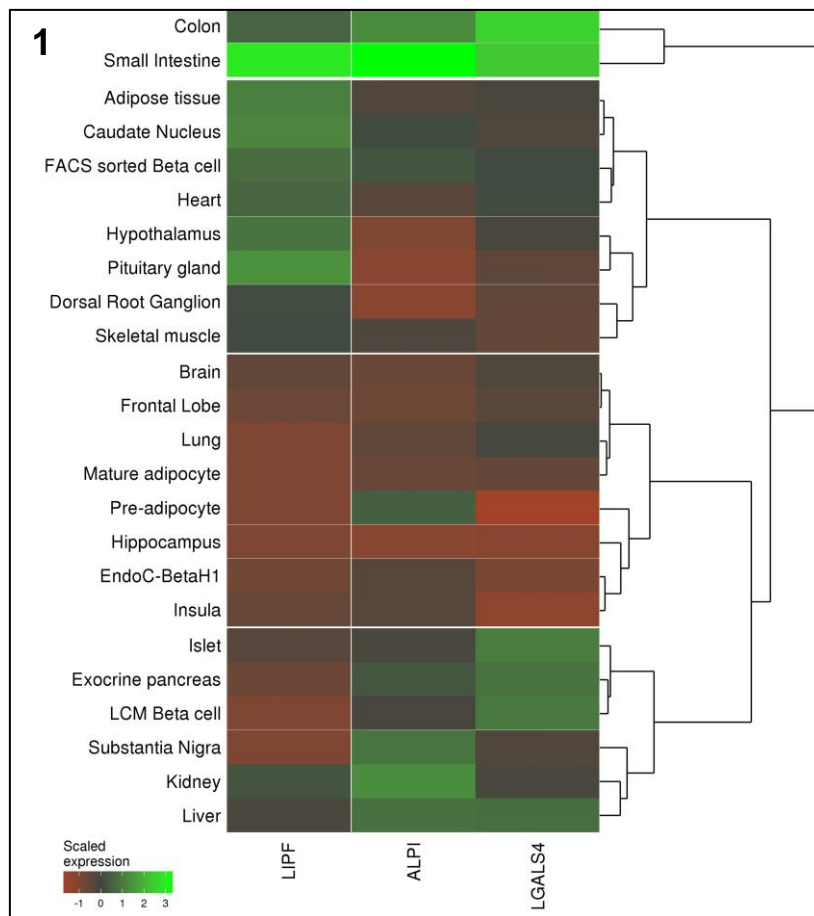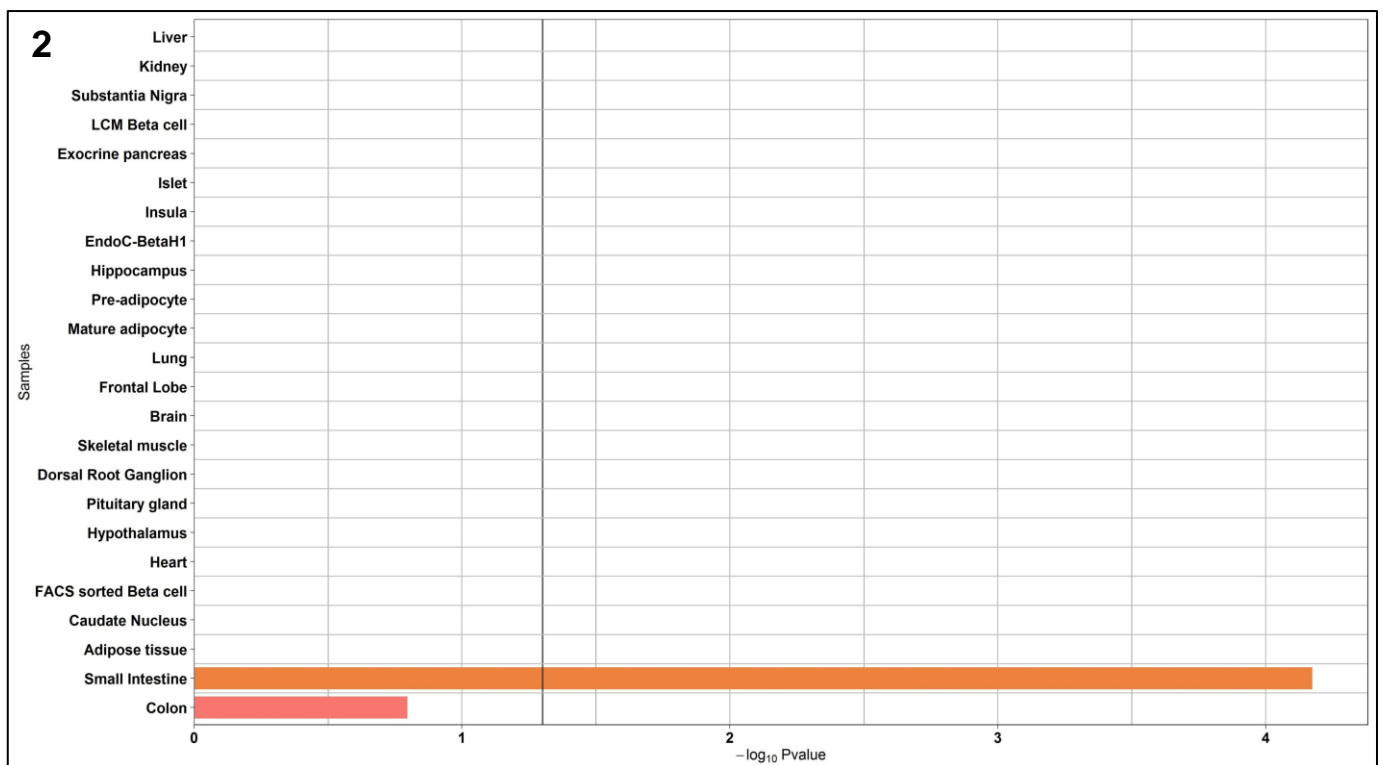

**Figure C. (1) Heat map representing the expression of three genes known to be highly expressed in adipose tissue in the panel of human organs, tissues and cells; (2) Enrichment analysis of adipose tissue markers expression in the panel of human organs, tissues and cells. The black vertical line denotes a  $p$ -value of 0.05.**

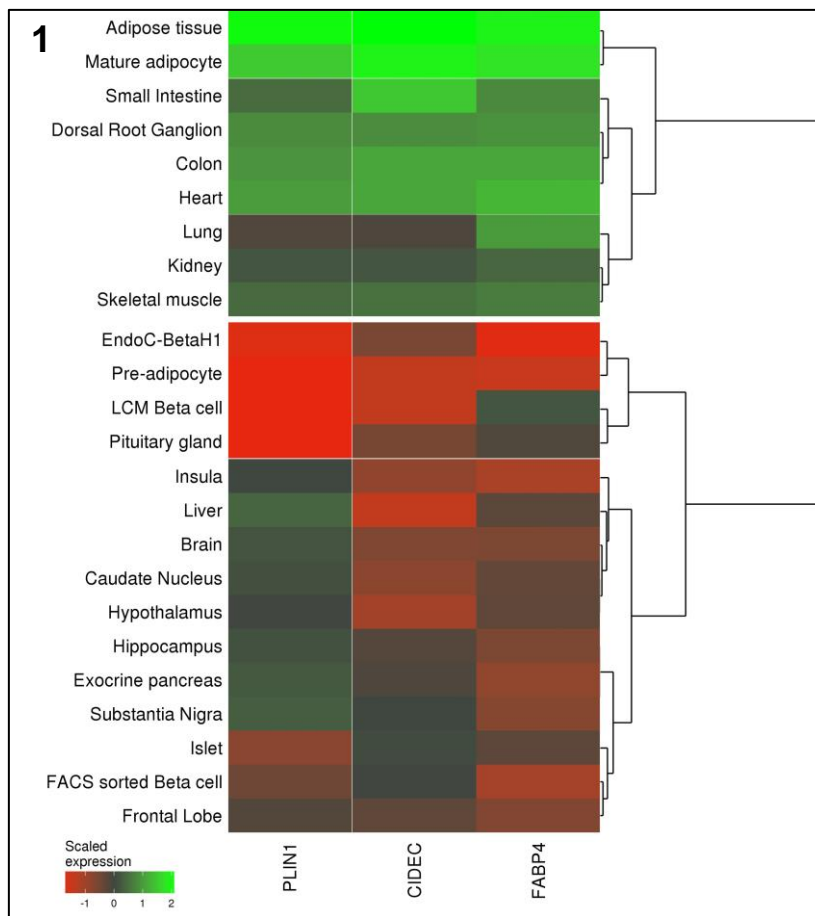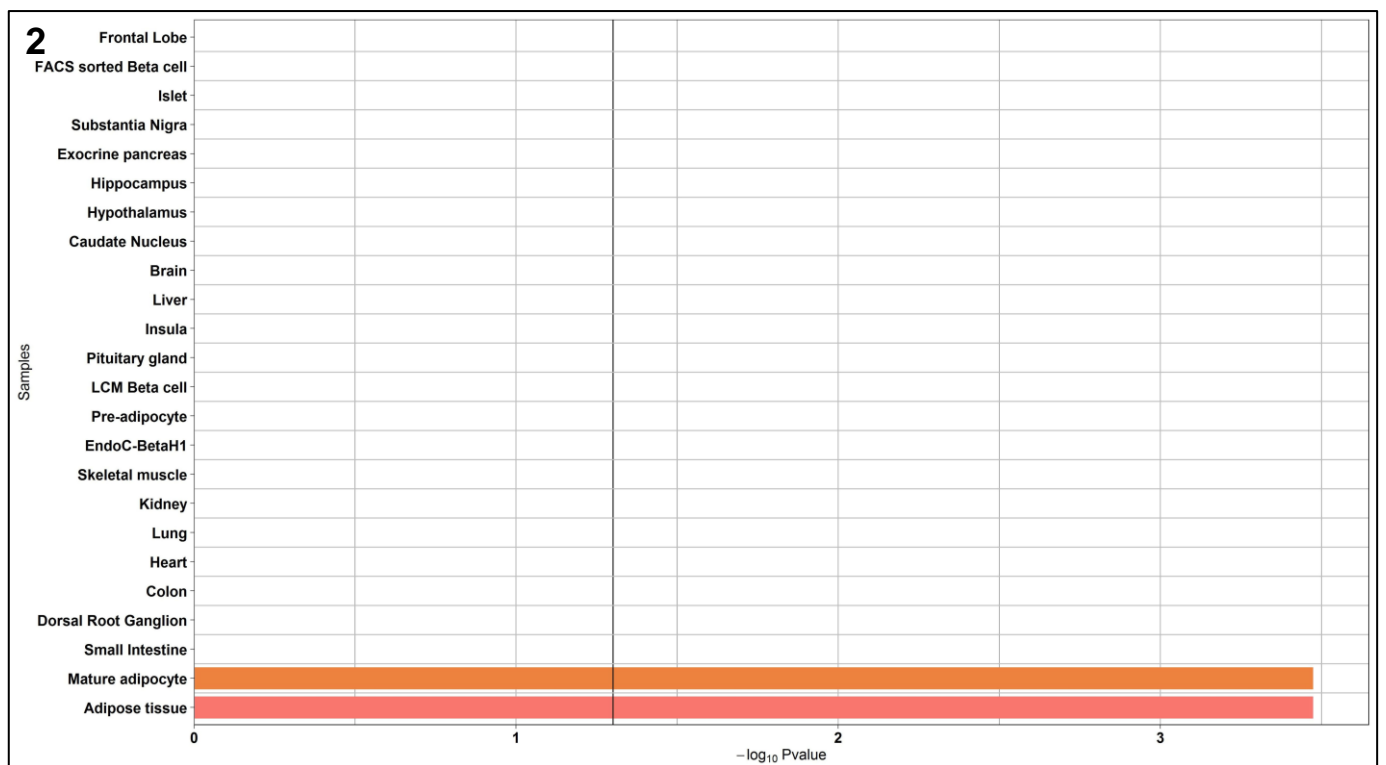

**Figure D. (1) Heat map representing the expression of four genes known to be highly expressed in kidney in the panel of human organs, tissues and cells; (2) Enrichment analysis of kidney markers expression in the panel of human organs, tissues and cells. The black vertical line denotes a  $p$ -value of 0.05.**

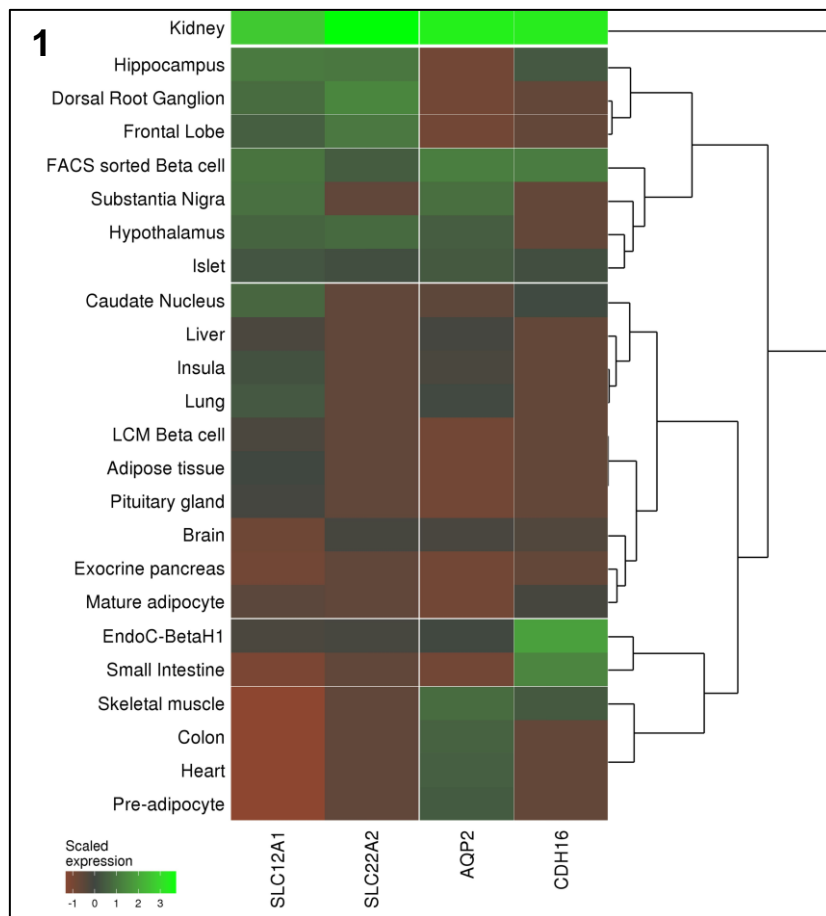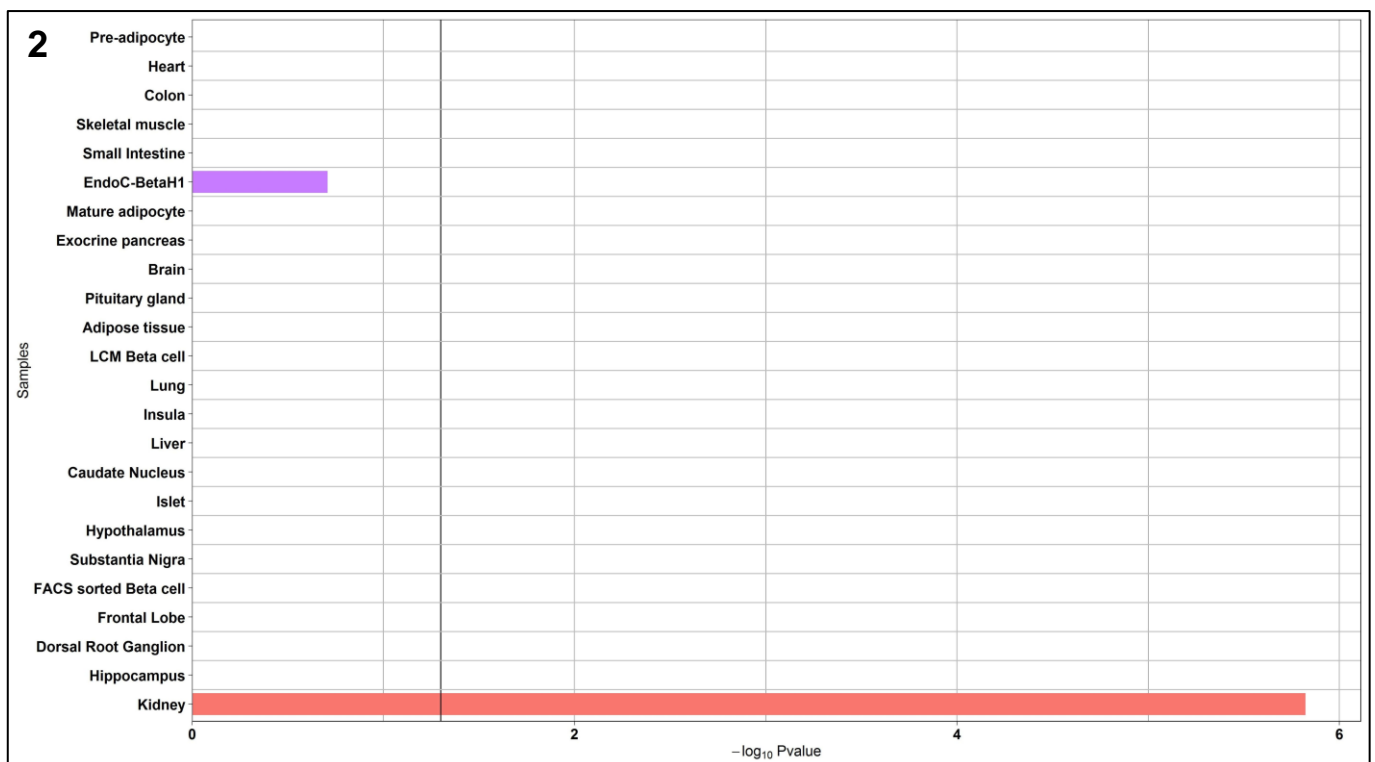

**Figure E. (1) Heat map representing the expression of three genes known to be highly expressed in lung in the panel of human organs, tissues and cells; (2) Enrichment analysis of lung markers expression in the panel of human organs, tissues and cells. The black vertical line denotes a  $p$ -value of 0.05.**

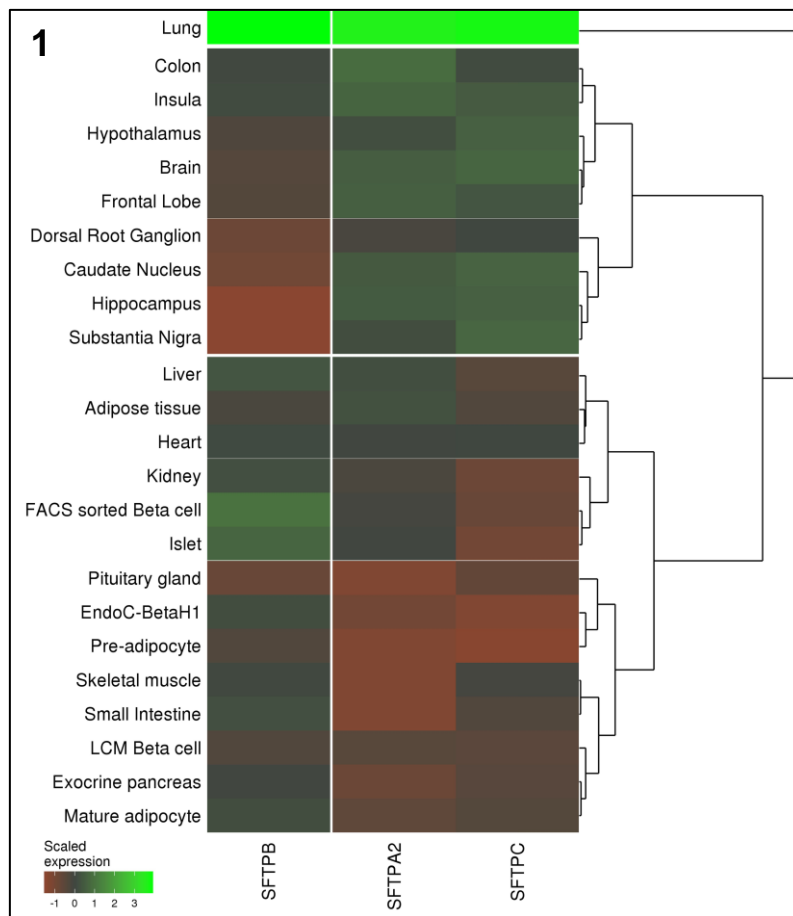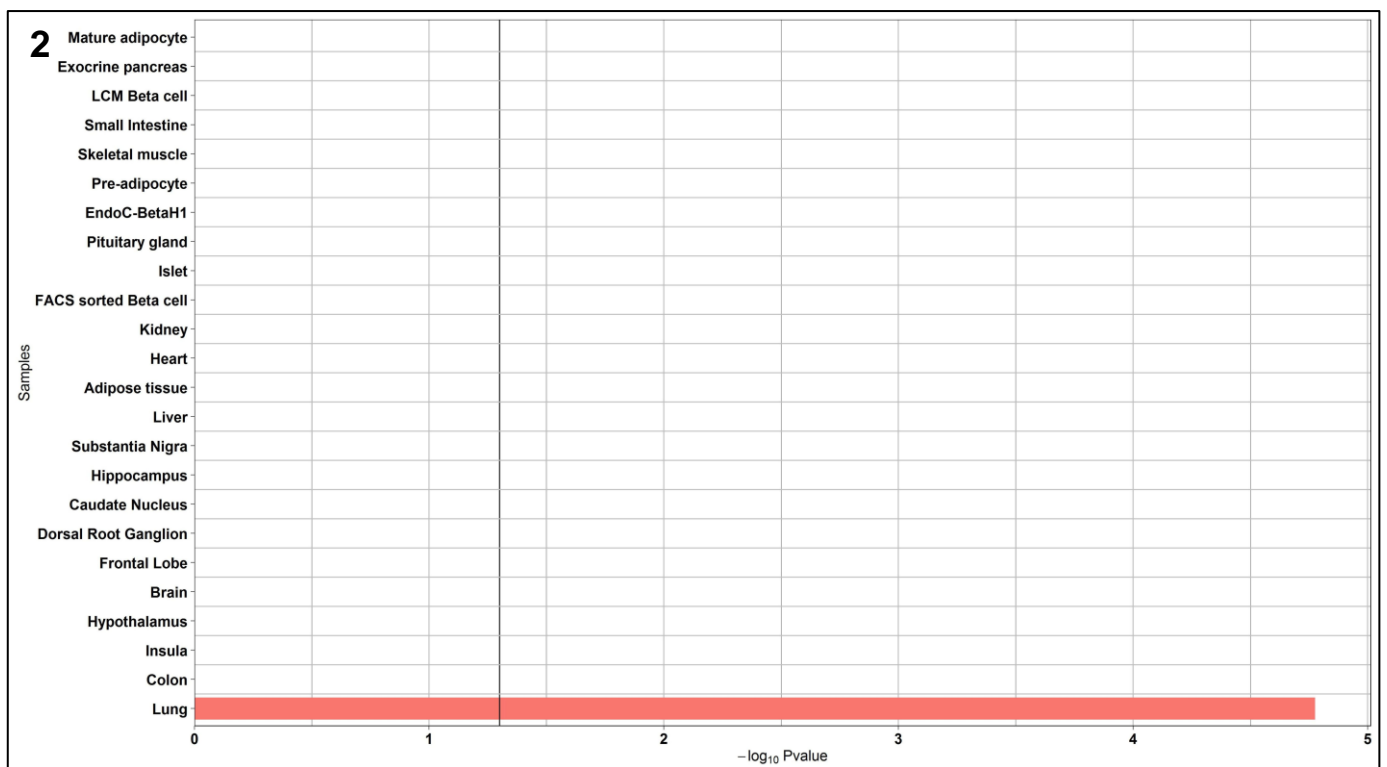

**Figure F. (1) Heat map representing the expression of 13 genes known to be highly expressed in pancreatic islets in the panel of human organs, tissues and cells; (2) Enrichment analysis of pancreatic islet markers expression in the panel of human organs, tissues and cells. The black vertical line denotes a  $p$ -value of 0.05.**

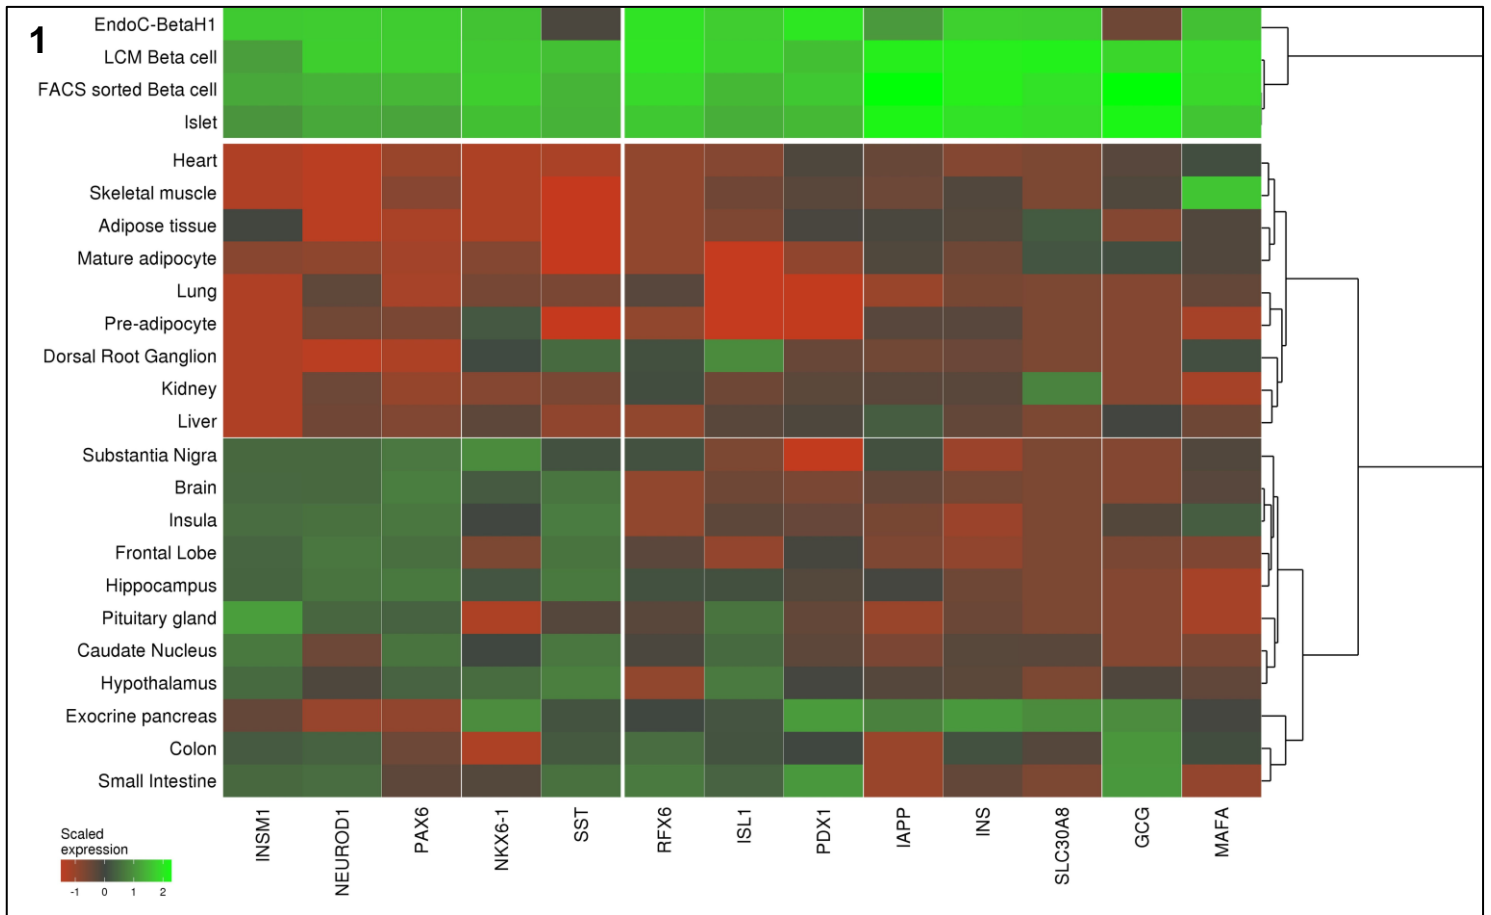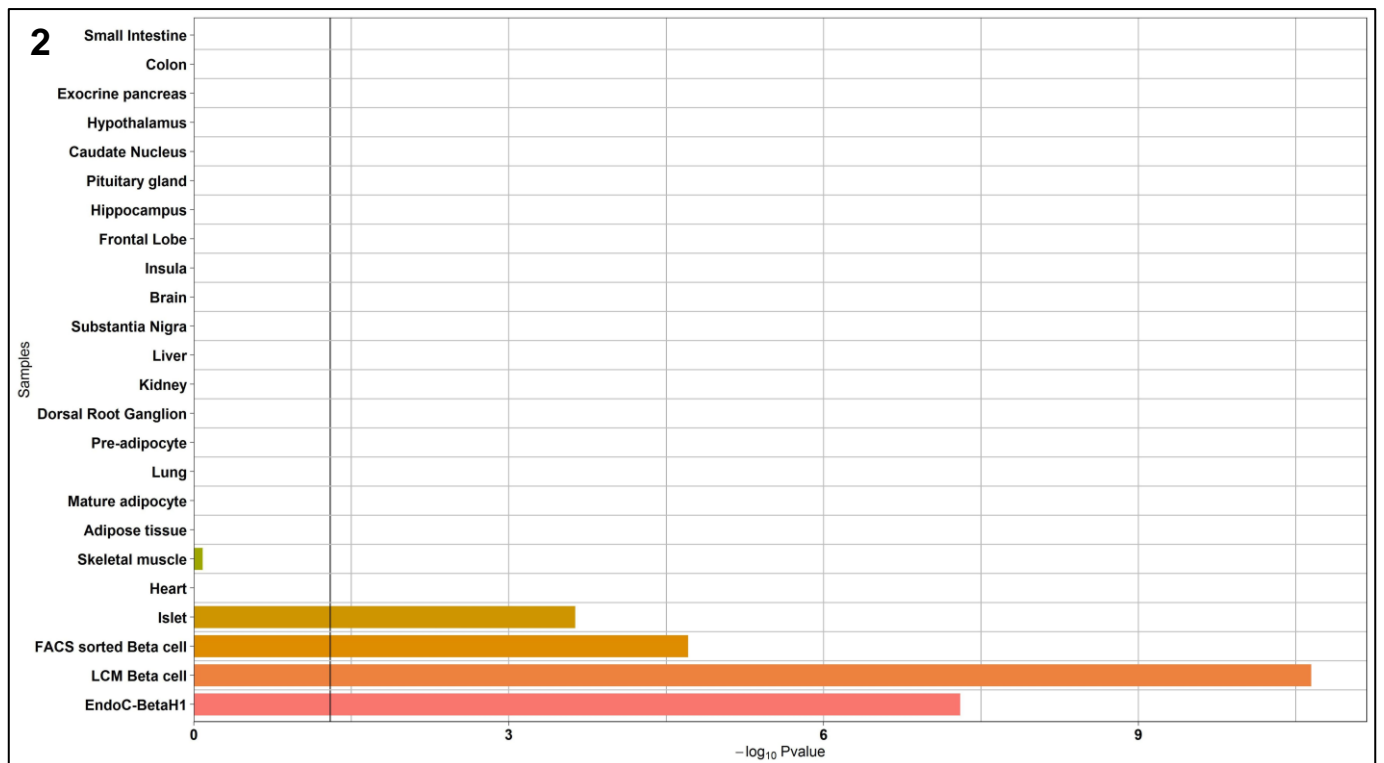



**Figure H. Decreased expression of target genes in EndoC-βH1 cells.** EndoC-βH1 cells were transfected with control non-targeting pool siRNA (siNTP) or target gene siRNA, and were analyzed 72 hours post-transfection. The mRNA expression of target genes and *INS* (encoding insulin) was determined by real-time quantitative PCR. Results are presented relative to gene expression in siNTP-transfected cells. *PSMB2* was used as endogenous control. Data from at least three independent transfections are presented.

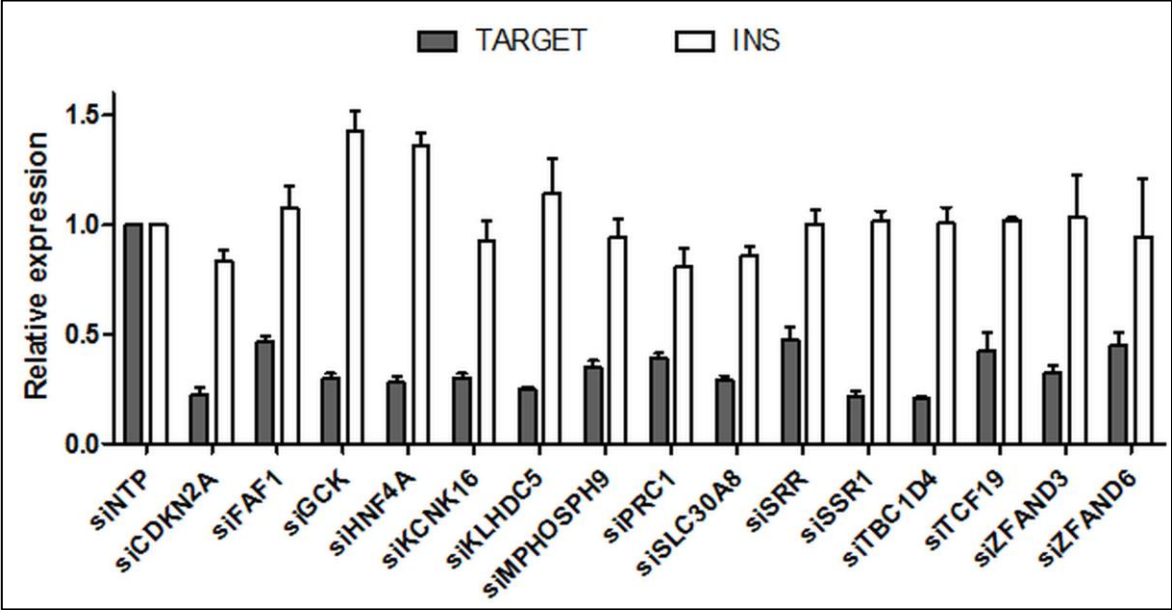



**Figure I. Decreased expression of *MPHOSPH9* (1), *SSR1* (2), *FAF1* (3) or *KLHDC5* (4) do not lead to impaired insulin secretion from EndoC- $\beta$ H1 cells.** EndoC- $\beta$ H1 cells were transfected with control non-targeting pool siRNA (siNTP) or target gene siRNA, and were analyzed 72 hours post-transfection. Insulin secretion (percentage of secretion of the total insulin content) was analyzed in response to 60 minutes incubation with 0.5 mM glucose ( $\pm$  0.5 mM IBMX), followed by 60 minutes incubation with 16.7 mM glucose ( $\pm$  0.5 mM IBMX). Data are mean values  $\pm$  SEM of at least three independent experiments. *ns*, not significant. *Glc*, glucose; *IBMX*, phosphodiesterase inhibitor 3-isobutyl-1-methylxanthine.

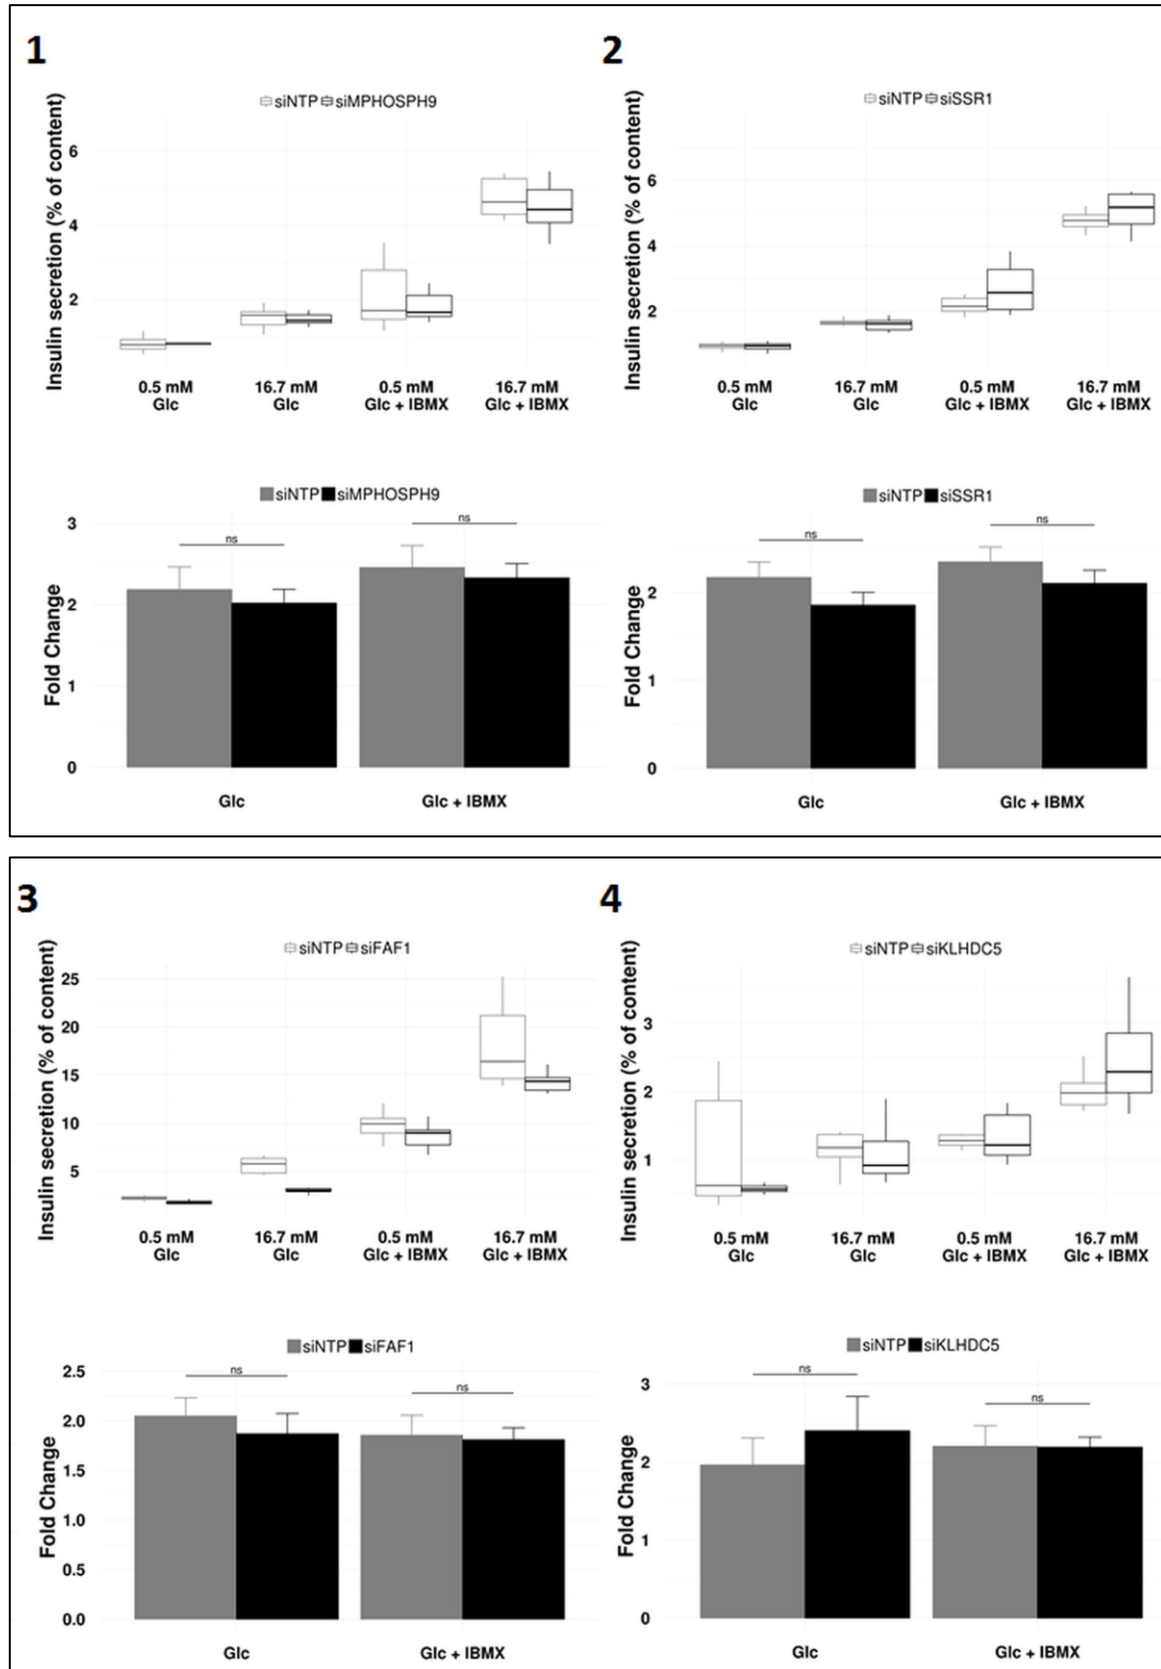

**Figure J. SRR (1) and ZFAND6 (2) are expressed in pancreatic islets.** Representative images of immunofluorescence staining for SRR (green; A), ZFAND6 (green, B) and insulin (red) performed on fixed tissue sections from normal human pancreases. Yellow (merged images) indicates co-localization of SRR or ZFAND6 with insulin. Blue, DAPI.

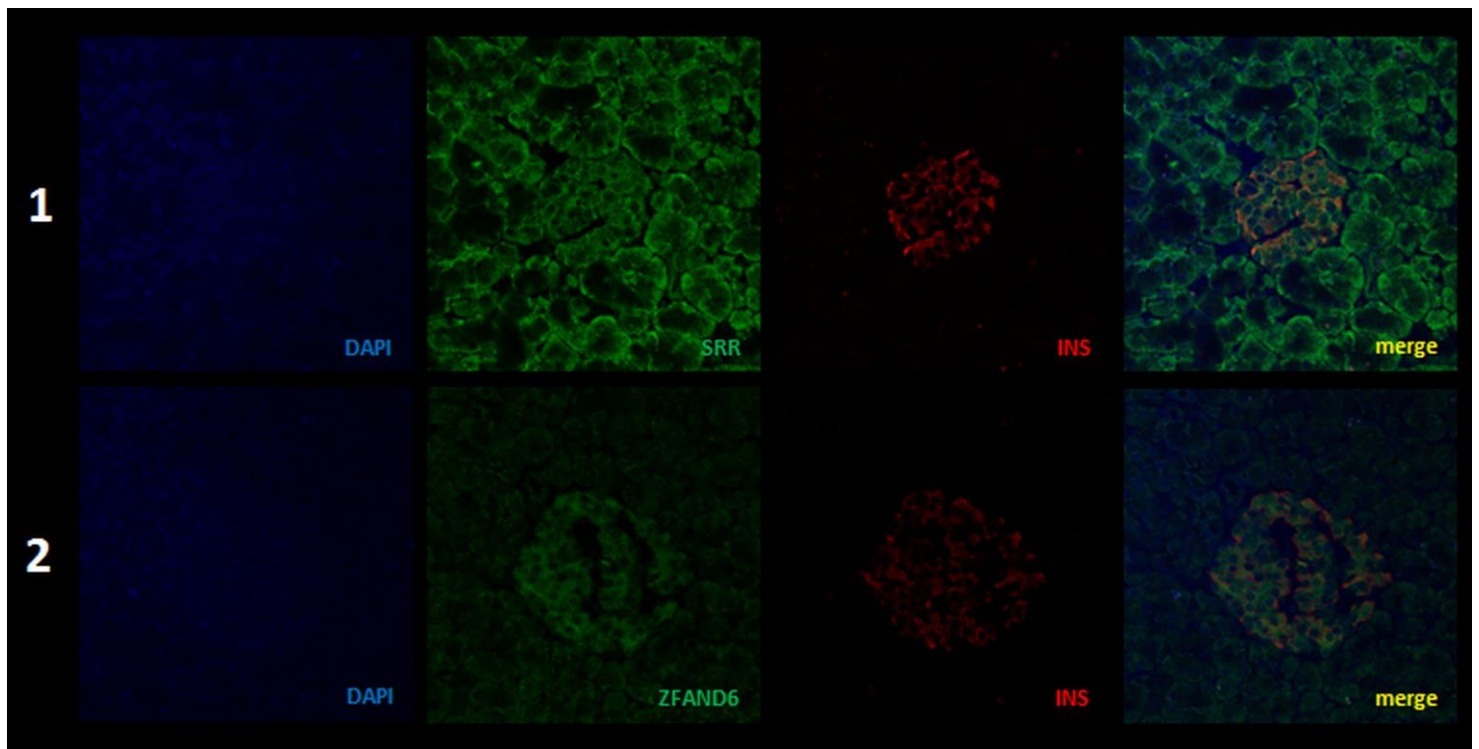

**Figure K. PRC1 (1), SRR (2), ZFAND3 (3) and ZFAND6 (4) are expressed in EndoC-βH1 cells.** Representative images of immunofluorescence staining for PRC1 (green; 1), SRR (green; 2), ZFAND3 (green; 3), ZFAND6 (green, 4) performed on fixed EndoC-βH1 cells. Blue, DAPI.

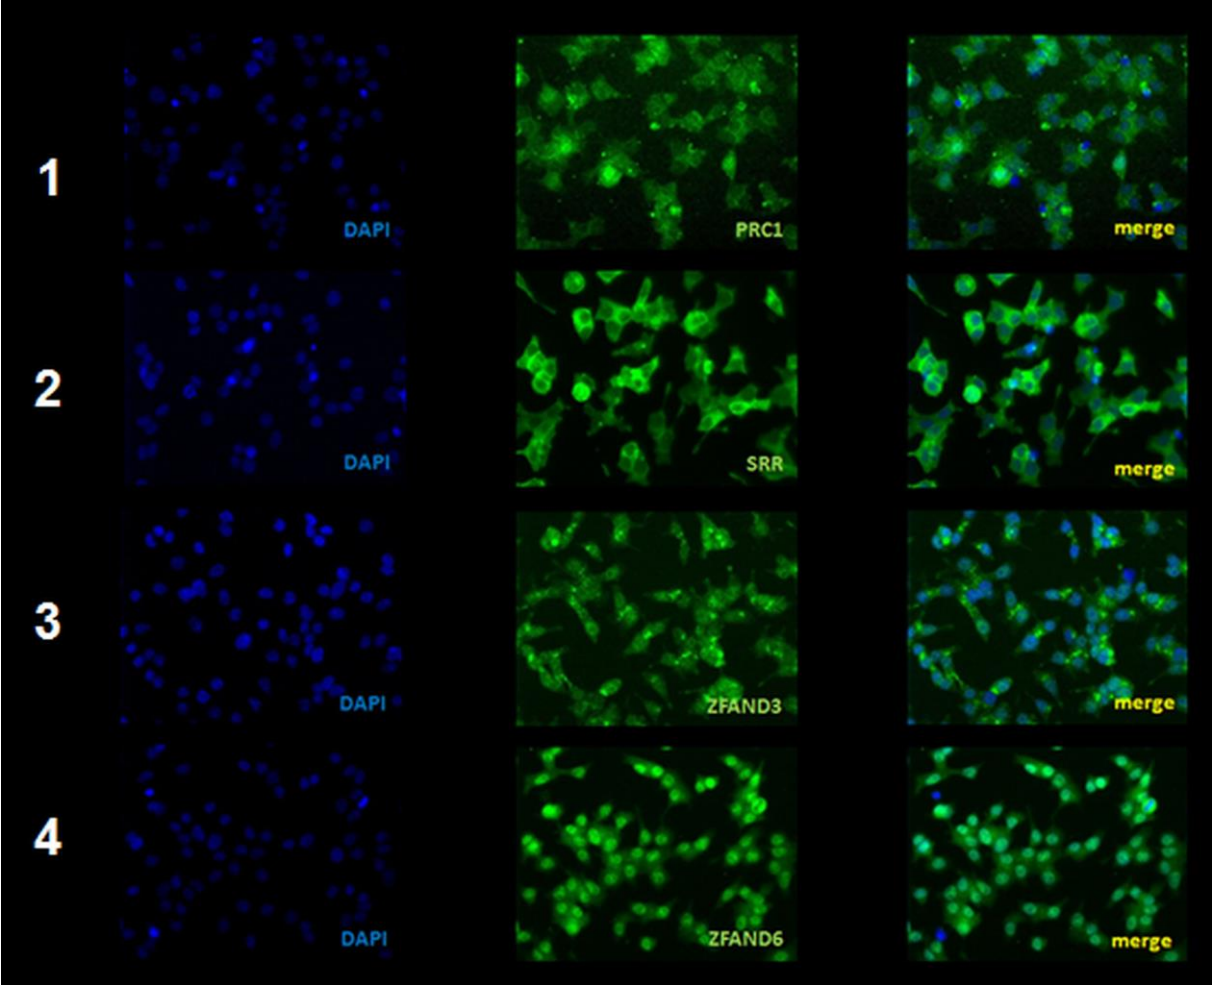





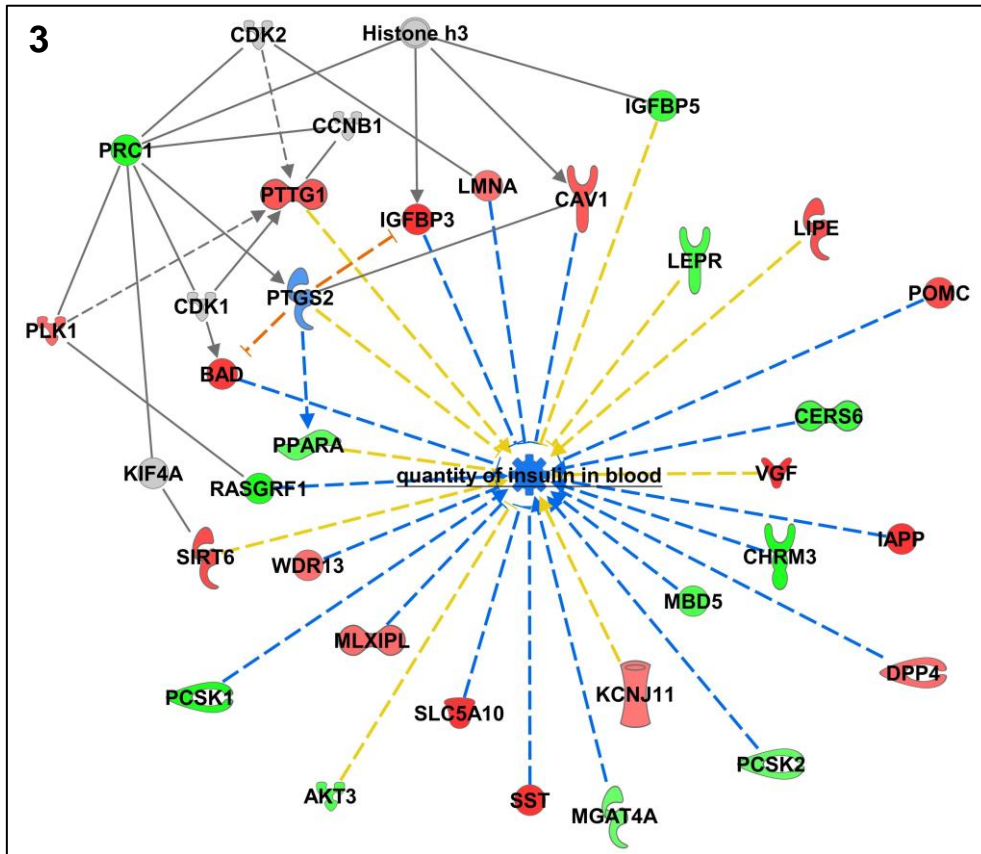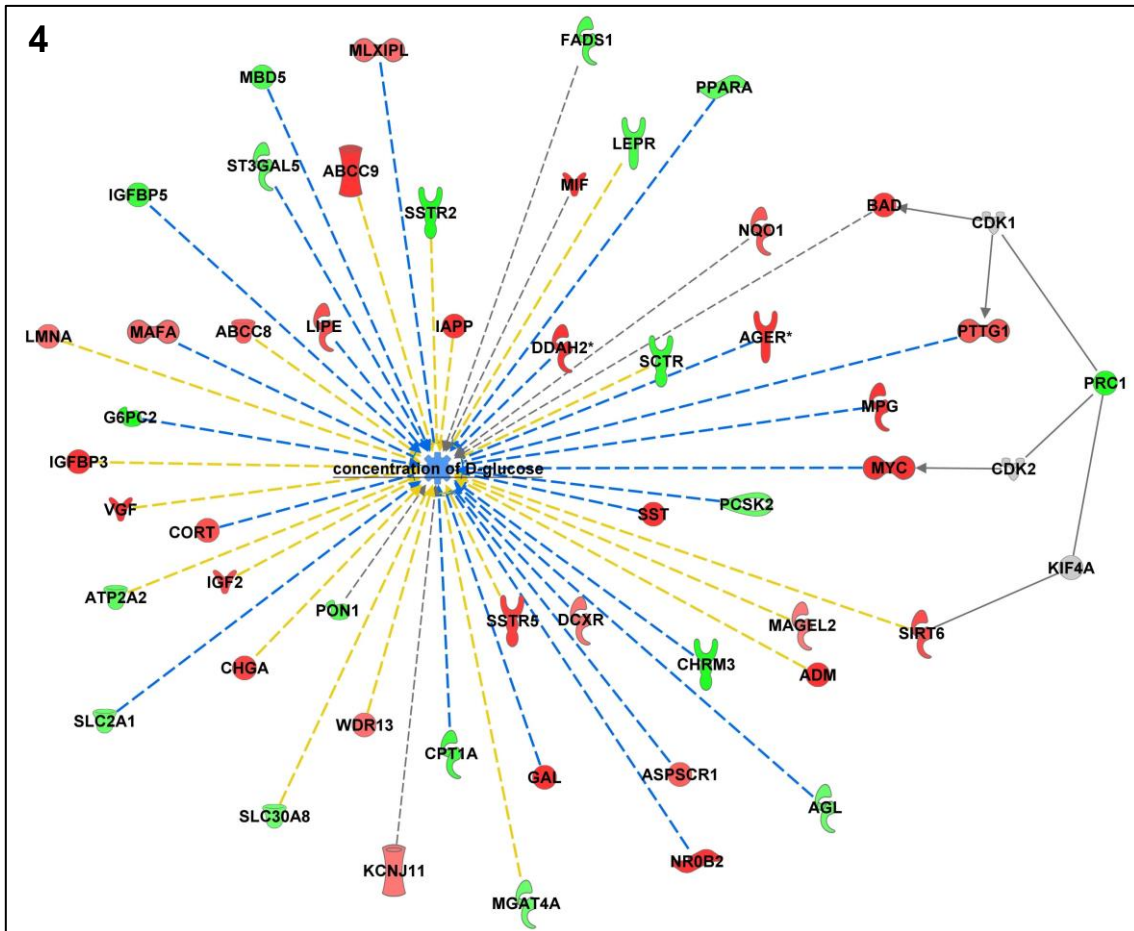

**Figure M. Decreased *SRR* expression in EndoC- $\beta$ H1 cells emphasizes several networks found by IPA: (1) a network related to serine phosphorylation; (2) a network related to serine phosphorylation of peptide; (3) a network related to endoplasmic reticulum stress response; (4) a network related to congenital disorders of glycosylation. The legends used in each figure are denoted in Figure 7.**

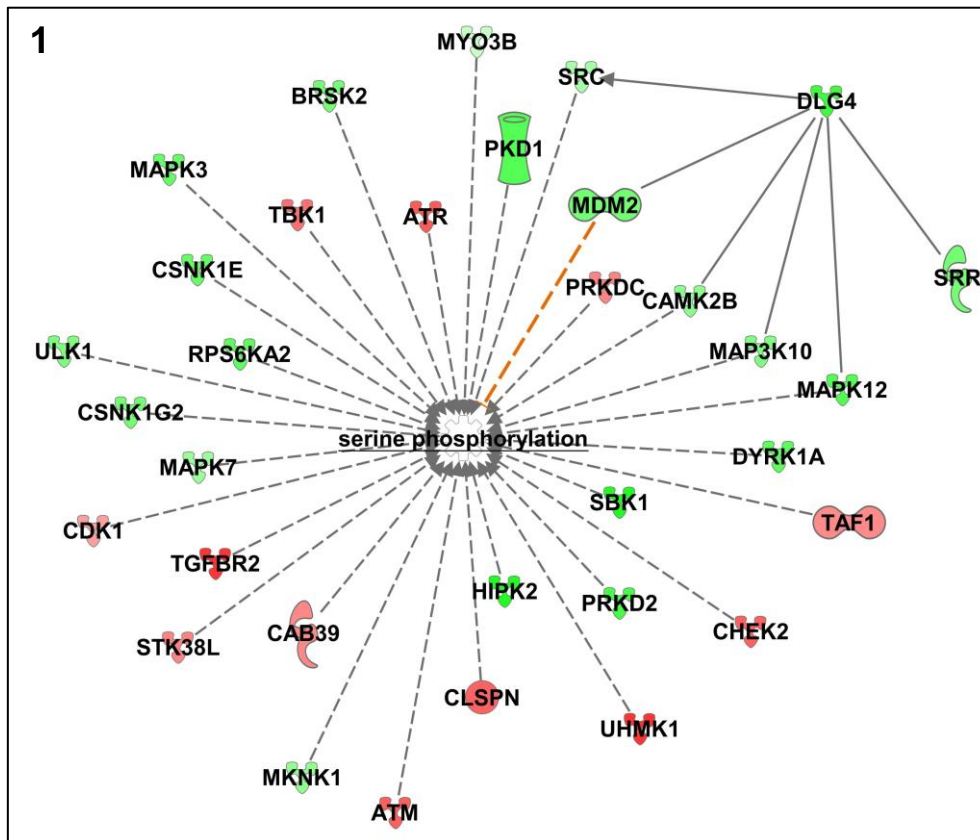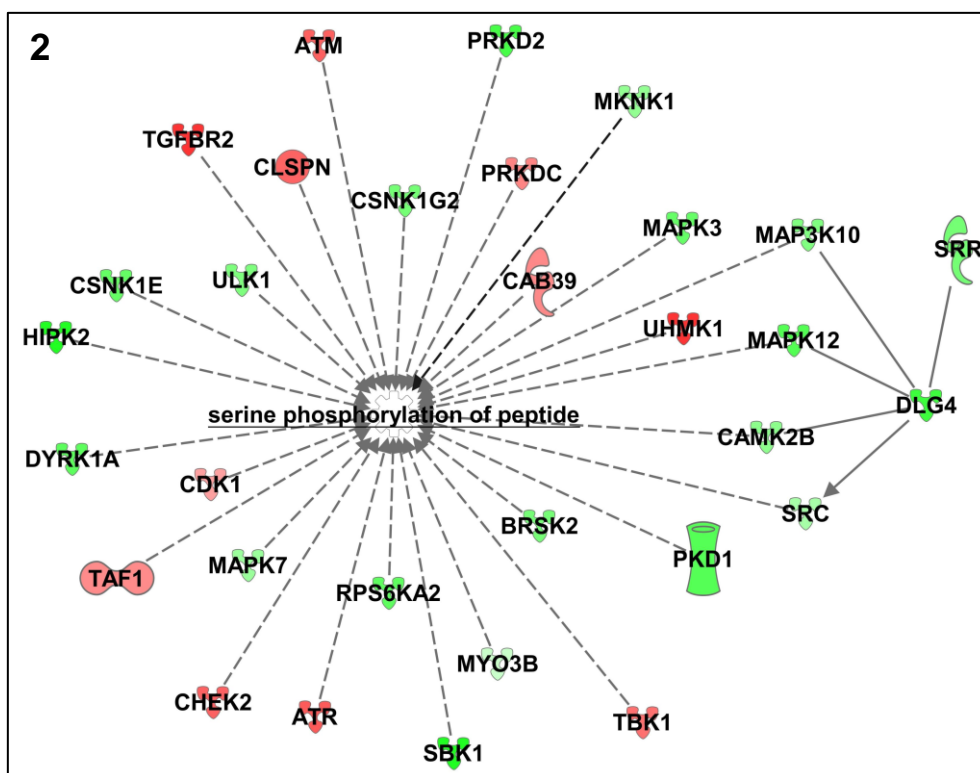

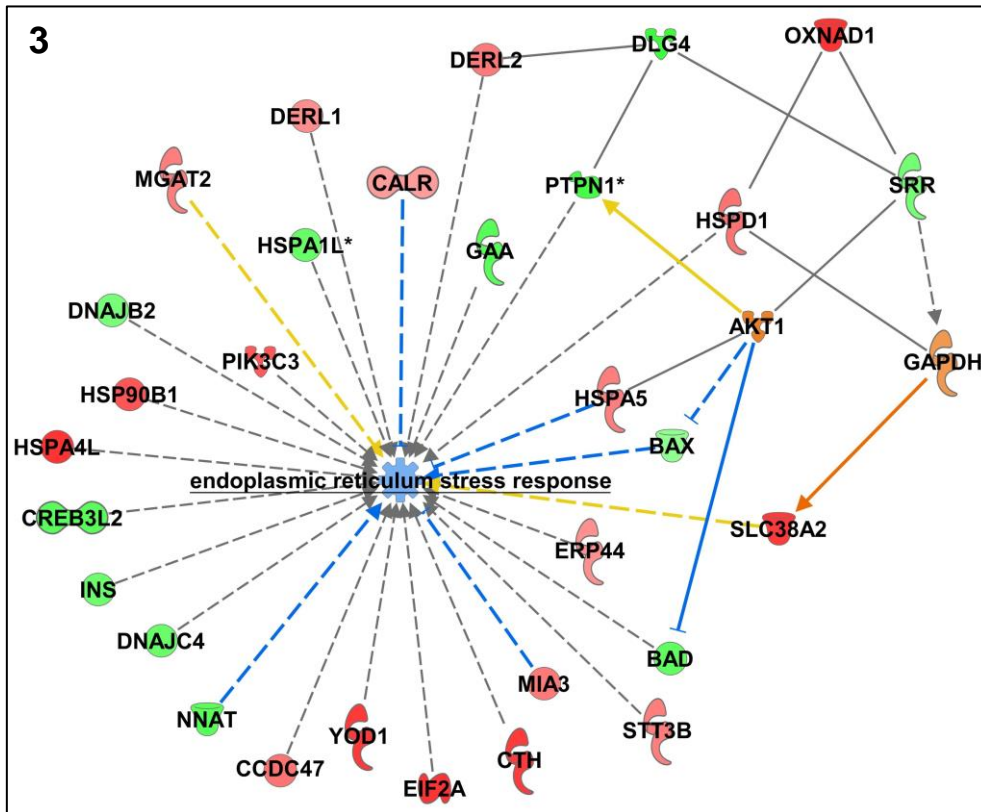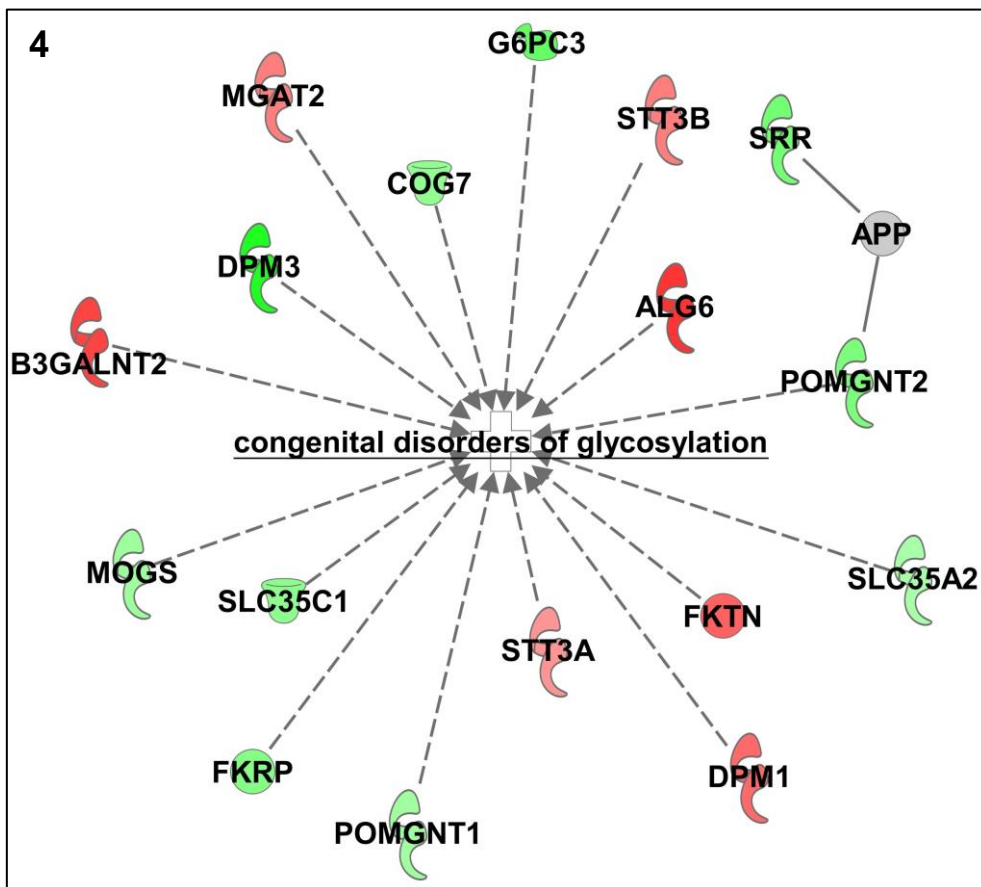

Figure N. Decreased *ZFAND6* expression in EndoC-βH1 cells emphasizes several networks found by IPA: (1) a network of 27 molecules entitled “Cell Signaling, Lipid Metabolism, Small Molecule Biochemistry”; (2) a network related to glycolysis; (3) a network related to the quantity of insulin in blood; (4) a network related to abnormal morphology of pancreas; (5) a network related to abnormal morphology of small islets of Langerhans. The legends used in each figure are denoted in Figure 7.

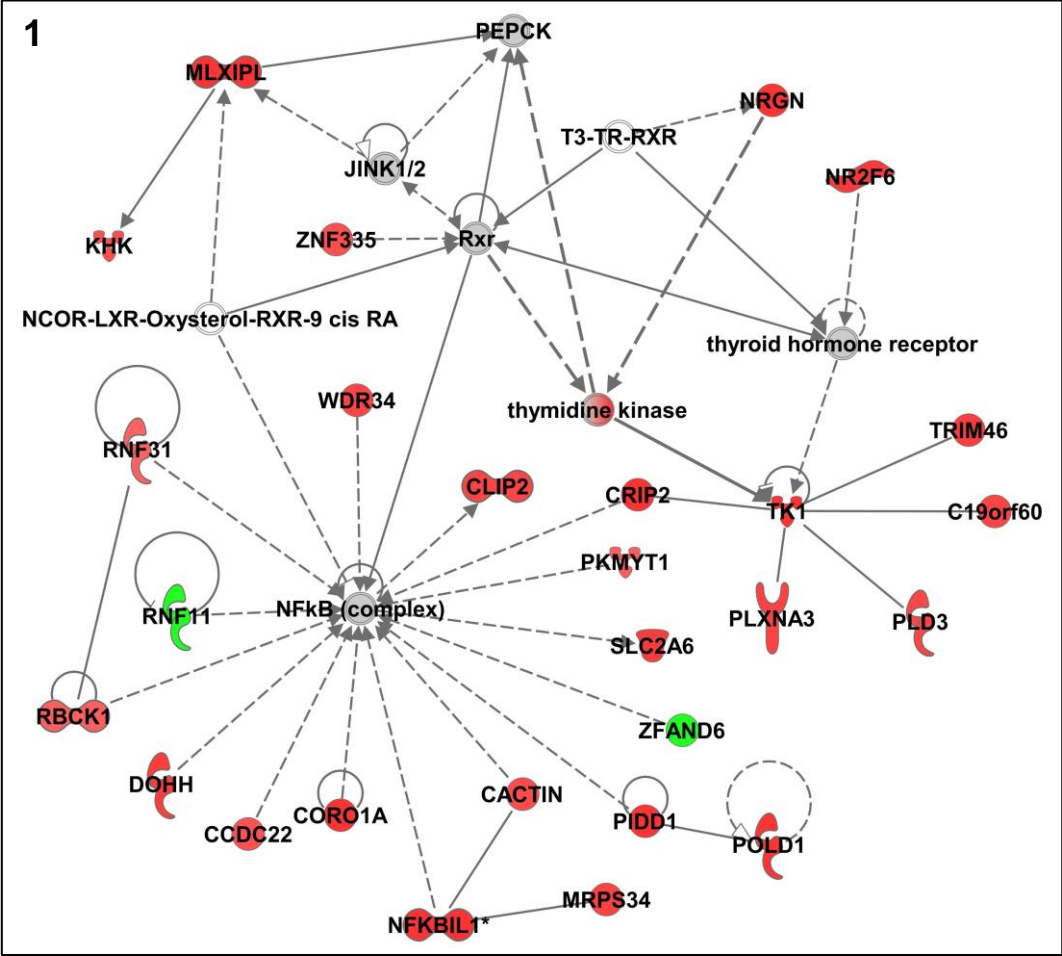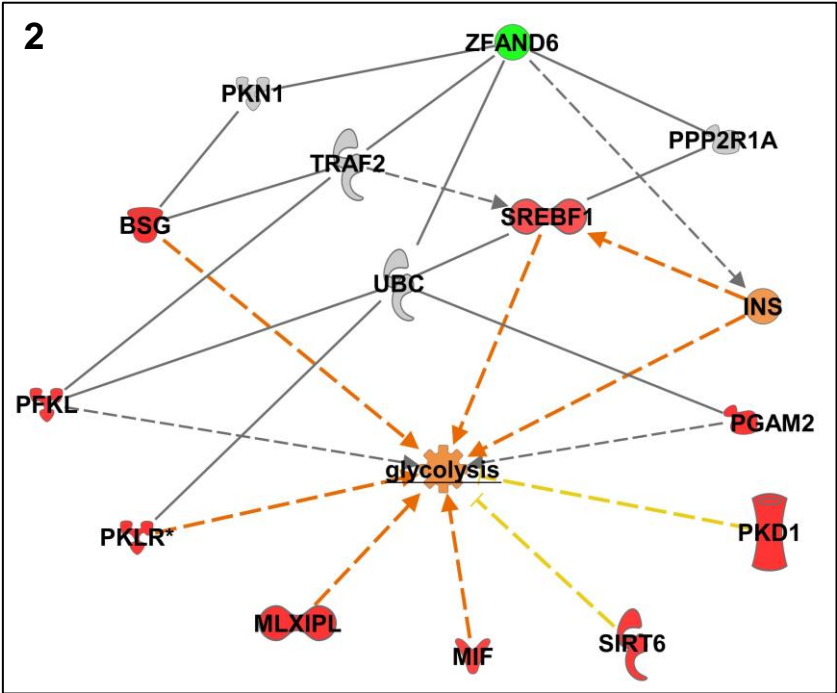



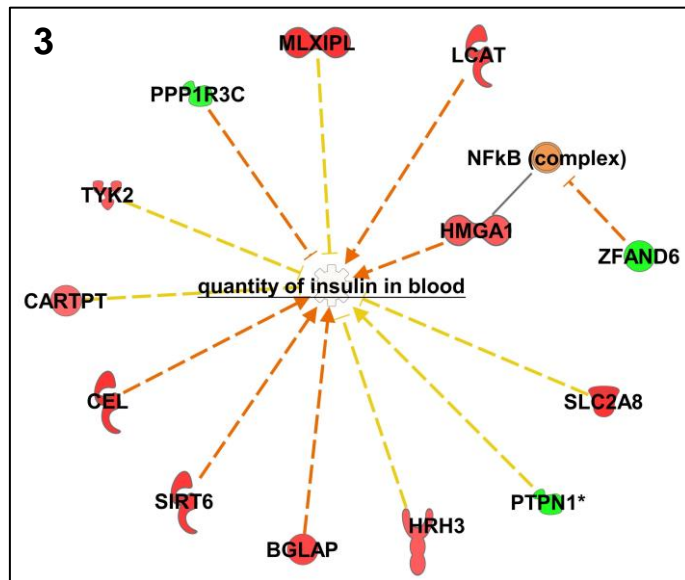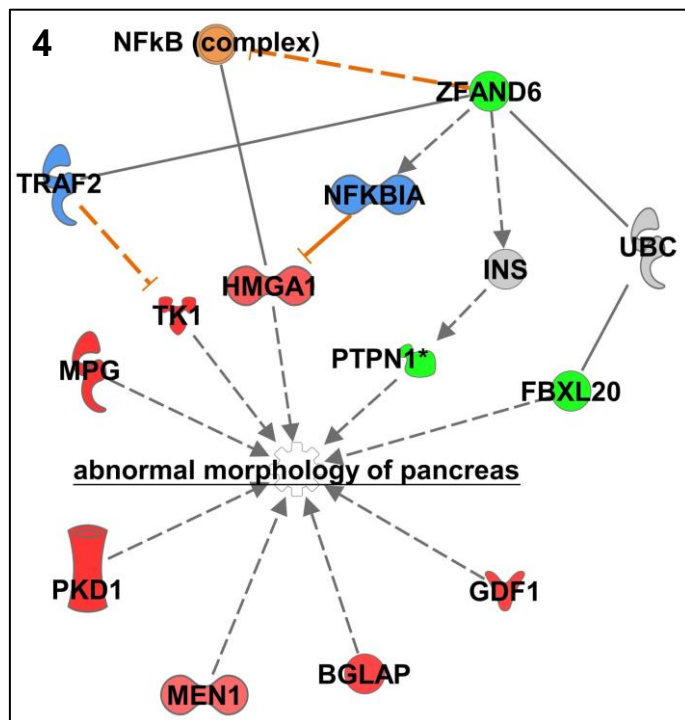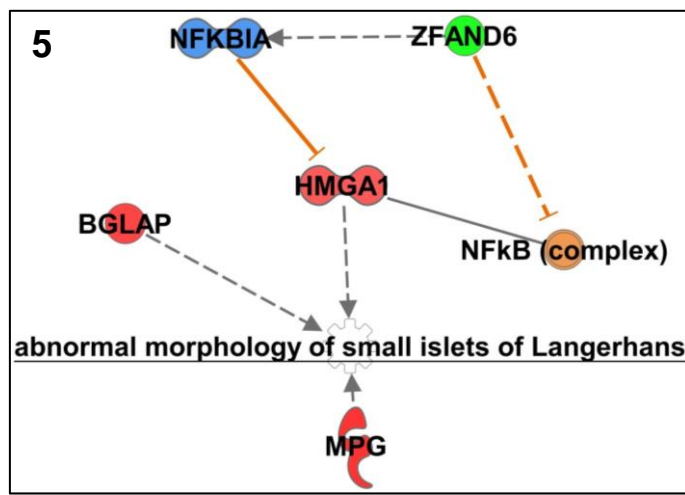

**Figure O. Decreased ZFAND3 expression in EndoC-βH1 cells emphasizes several networks found by IPA: (1) a network of 16 molecules entitled “Cellular Assembly and Organization, Lipid Metabolism, Molecular Transport”; (2) a network related to the transport of alpha-amino acid. The legends used in each figure are denoted in Figure 7.**

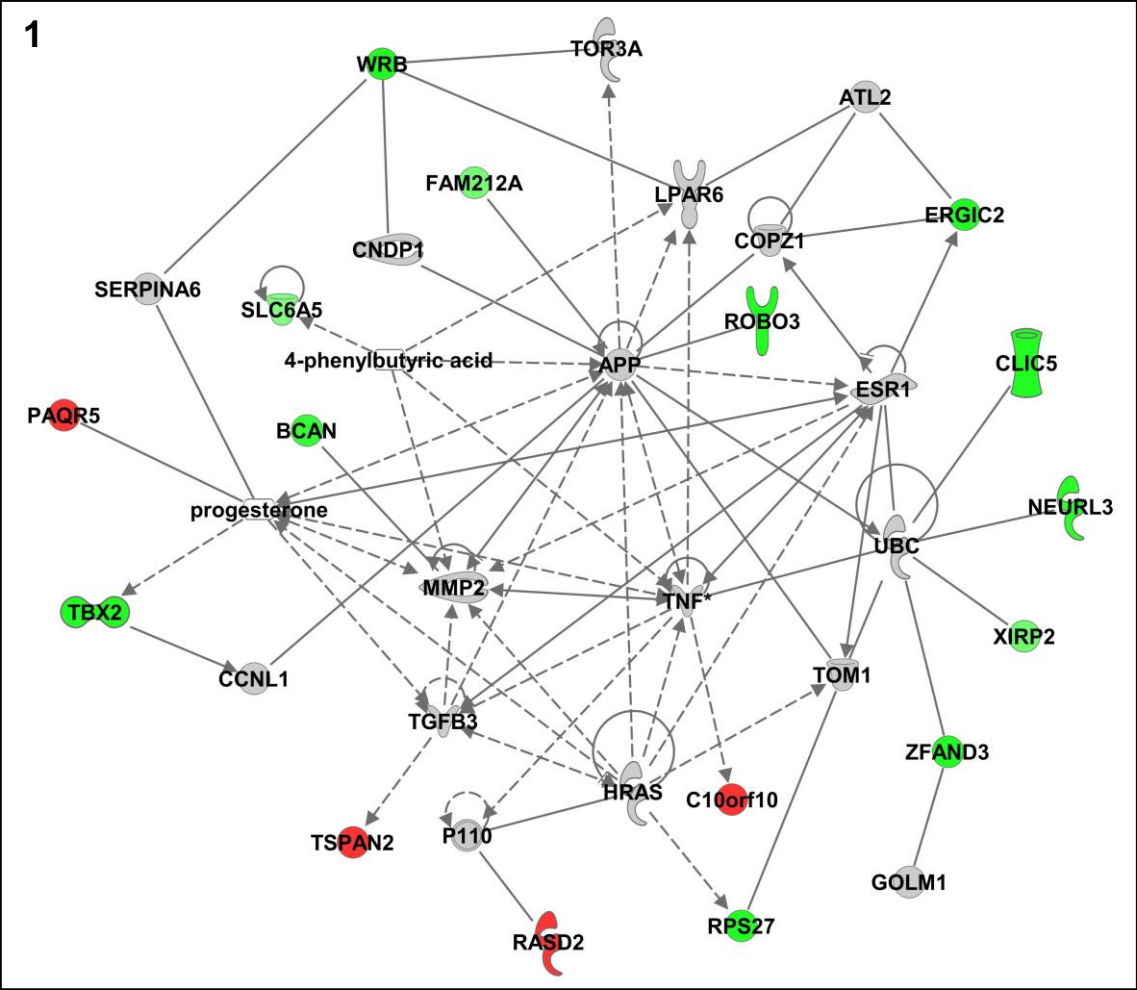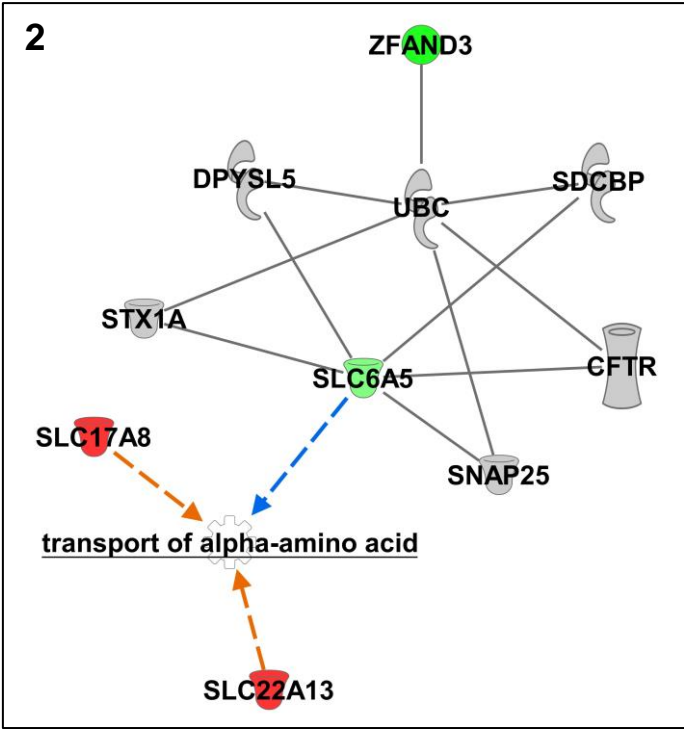

**Figure P. Positive correlation between the expression of *Ins2* and the expression of *Prc1*, *Srr*, *Zfand6* and *Zfand3* in mouse pancreatic islets with altered beta-cell function.** The expression of the five genes were investigated through quantitative RT-PCR (housekeeping genes: *Actb*) in pancreatic islets from mouse models with altered pancreatic beta-cell function due to STZ treatment (two pools of pancreatic islets treated or not with STZ from eight 10-week old mice; **P1**, **P2**) or to a non-sense mutation in the leptin gene in *ob/ob* mice (pancreatic islets from five 5-week old mice or from five 8-week old mice; **P3**, **P4**). Data represent mean values  $\pm$  SD. \* $p < 0.05$ ; \*\* $p < 0.01$ ; \*\*\* $p < 0.001$ ; ns, not significant; STZ, streptozotocin; wk, week.

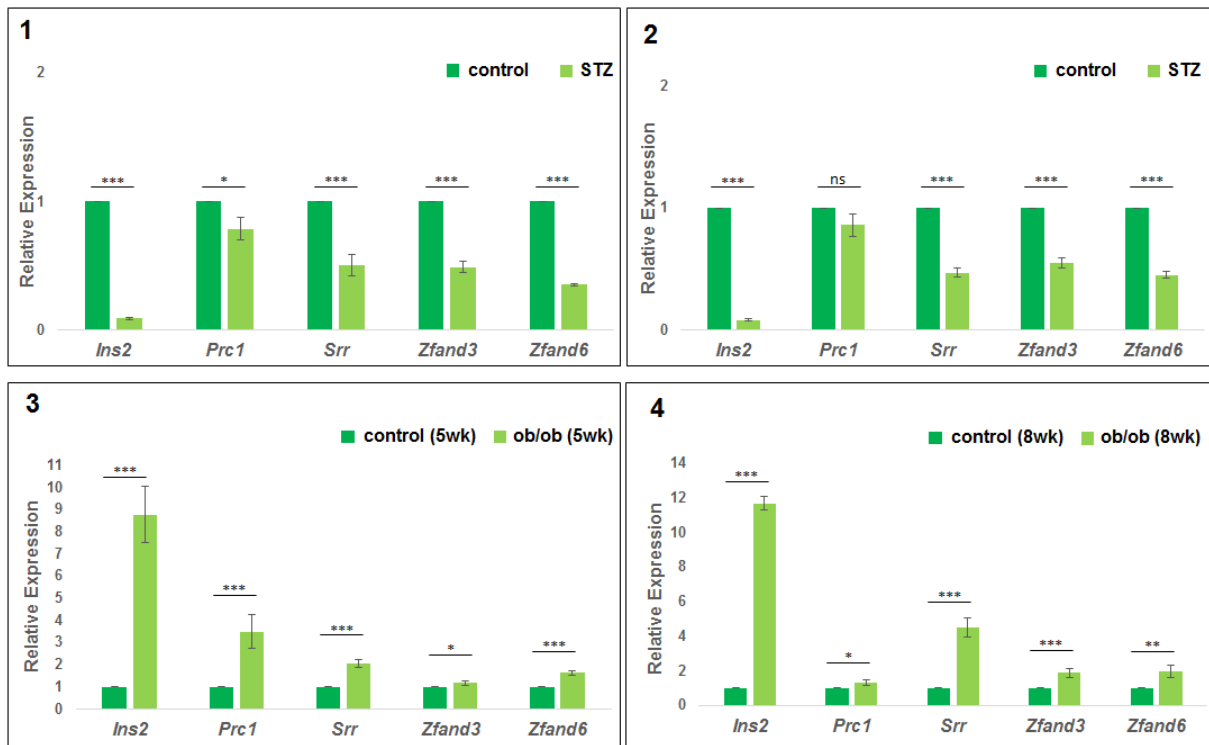

**Figure Q.** *PRC1* (1), *SRR* (2), *ZFAND6* (3) and *ZFAND3* (4) are ubiquitously expressed in our panel of human tissues.

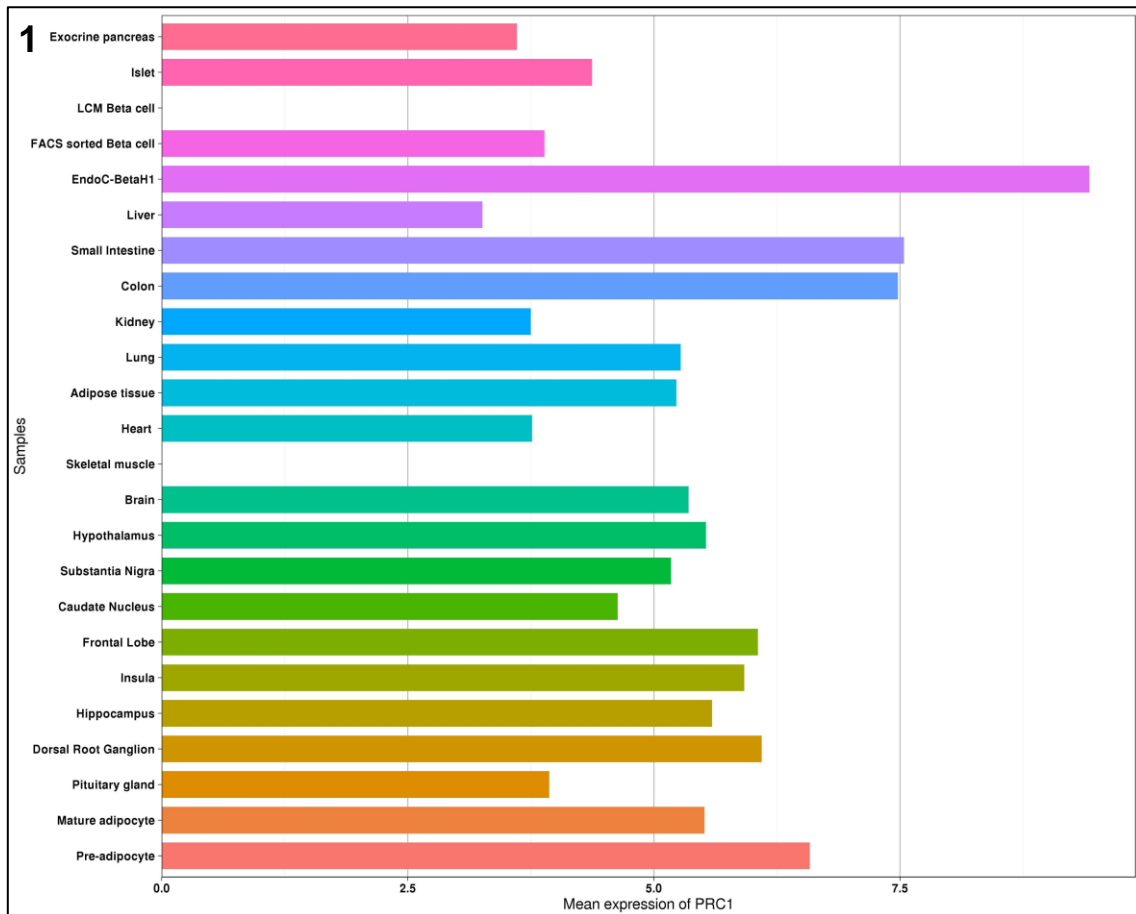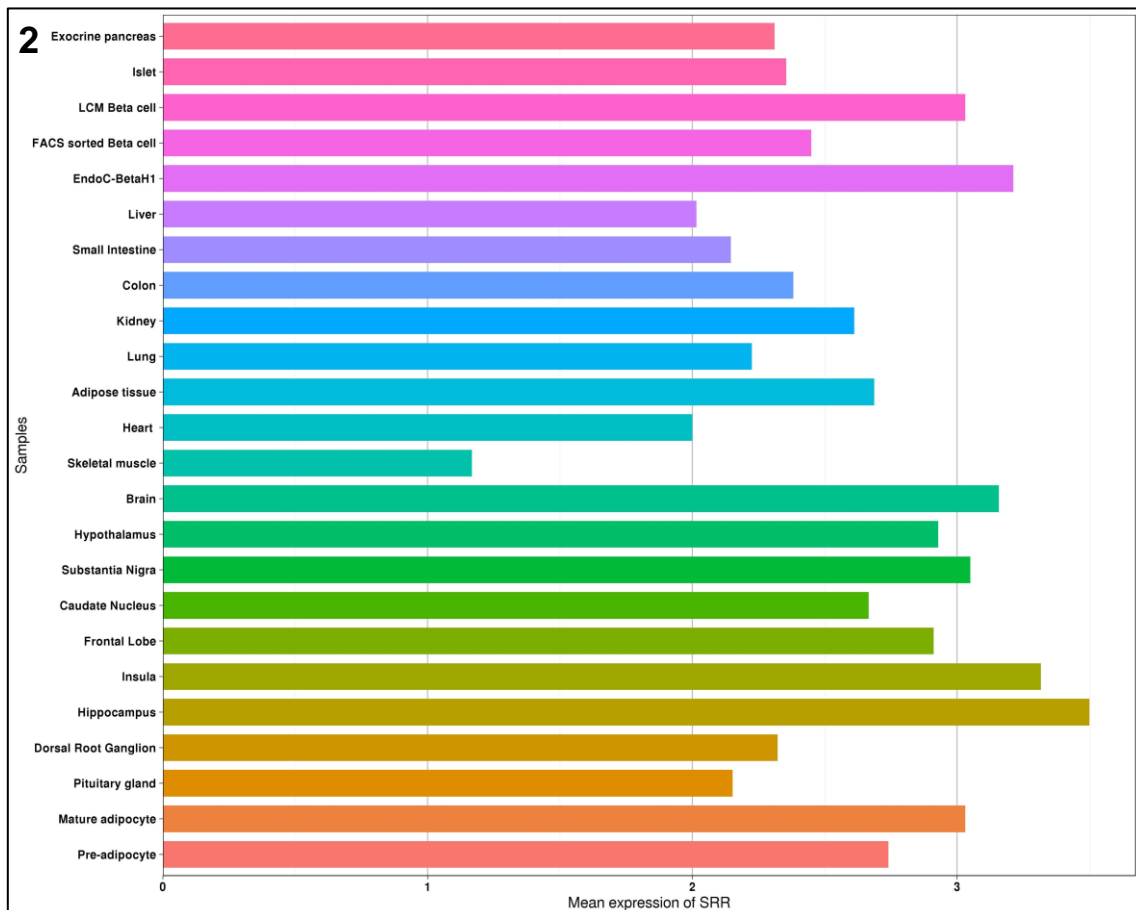

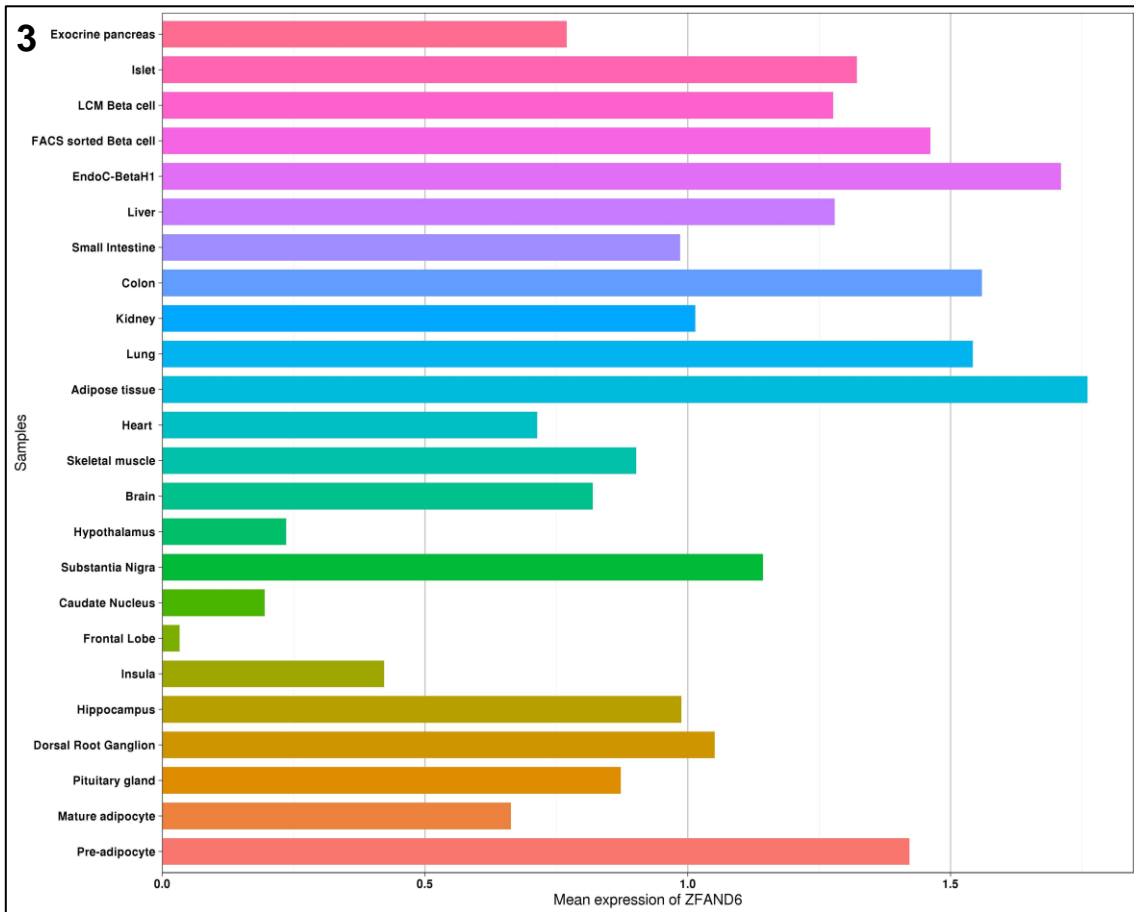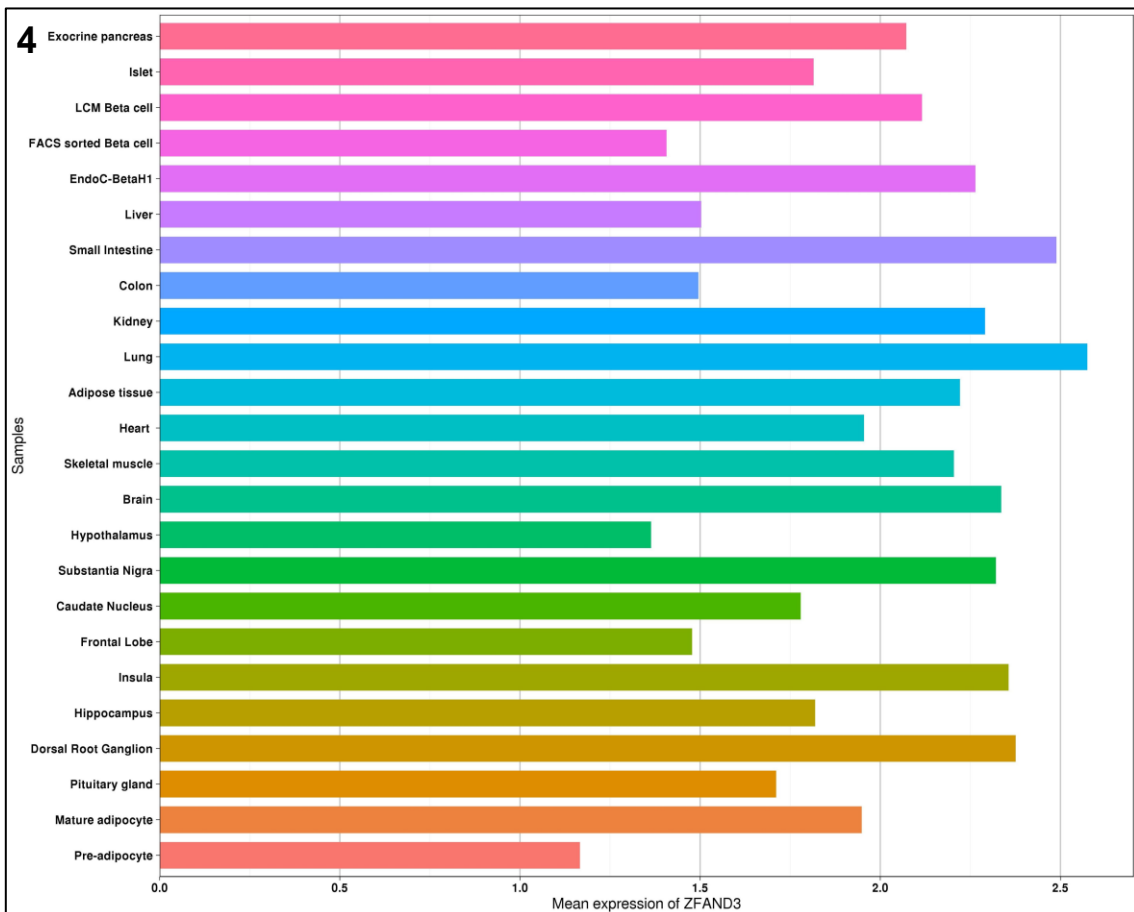

**Table A. Probe design and selection for the expression study.**

| Gene           | Accession      | Target sequence                                                                                                        | Tm <sub>CP</sub> | Tm <sub>RP</sub> | PN (CP;RP)              | Group                      |
|----------------|----------------|------------------------------------------------------------------------------------------------------------------------|------------------|------------------|-------------------------|----------------------------|
| <i>ABCC8</i>   | NM_000352.3    | ACCTCCGTGGTCTACTATCACA<br>ACATCGAGACTTCCAACCTCCC<br>CAAGCTGCTAATTGCCCTGCTG<br>GTGTATTGGACCCTGGCCTTCA<br>TCACCAAGACCA   | 81               | 82               | 309041;<br>209041       | Monogenic<br>diabetes gene |
| <i>ADAMTS9</i> | NM_182920.1    | AGTGAAATTATTAGAGACCCTGA<br>GCGAATACGAAATCGTGTCTCC<br>CATCCGAGTGAACGCTCTCGGA<br>GAACCCTTTCCCACGAACGTCC<br>ACTTCAAAGA    | 80               | 83               | 350001;<br>250001       | T2D gene                   |
| <i>ADCY5</i>   | NM_183357.2    | CCCCTCCATATTCATGCTCAGC<br>TTCTACCTGACCTGTTCCCTGCT<br>GCTGACCTTGGTGGTGTGGTGTG<br>TCTGTGATCTACTCCTGCGTAAA<br>GCTCTTCCC   | 83               | 80               | 350002;<br>250002       | T2D gene                   |
| <i>ALPI</i>    | NM_001631.3    | CAGCAAGGCTCAGGACAGCAAA<br>GCCTACACGTCCATCCTGTACG<br>GCAATGGCCCCGGGCTACGTGTT<br>CAACTCAGGCGTGCACAGAC<br>GTGAATGAGAGC    | 85               | 85               | 386252;<br>286252       | Marker of gut              |
| <i>ANK1</i>    | NM_020477.2    | CAGGGTACTTTTTCCCAACCTCA<br>TCTGTCAGAAATCCATGTGGGC<br>TTCCTGGAAAGAAAAAAAAAAAA<br>AAGAAAAGTGGCATGAAATCA<br>GTTTAAACACC   | 80               | 79               | 374572;<br>274572       | T2D gene                   |
| <i>ANKRD55</i> | NM_024669.2    | GCACAGCAGCAGAAGAGAGTGA<br>ACATTCTGCCAACCCACCAGT<br>GATGAAAATTAAGTGTGGGCA<br>CTCGCTGCAGAAATGTAGATGA<br>ATATGTATTTTC     | 85               | 77               | 351314;<br>251314       | T2D gene                   |
| <i>AP3S2</i>   | NM_005829.4    | GGTGCTAGGGCTCGTGAGCGC<br>CGGGGCCAAGTTTCCGAGTGCC<br>GCTCTCAGCAGCGCACCAACCG<br>GAAGTGATCGTGTGGGCGGA<br>AGGAGGAGCTTTC     | 85               | 85               | 355827;<br>255827       | T2D gene                   |
| <i>AQP2</i>    | NM_000486.5    | GTCTCACAGGTAGTATATGGTG<br>GAGCCAACACTTGAAGTCAAGAC<br>CTTTTACACAAAATCCCATGAT<br>TTTTCCACTGAGACAAATCCTAG<br>GCTCCTGGGA   | 80               | 82               | 365408;<br>265408       | Marker of kidney           |
| <i>ARAP1</i>   | NM_001040118.2 | GGCCACAGTGAAGGCCCTTATC<br>AGCCACCTGTACTGTGTTCAAGT<br>GCTTCTCAGACACGAACAGAT<br>GAACGTGCACAACCTGGCAATT<br>GTGTTTGGGCCC   | 83               | 83               | 370135;<br>270135       | T2D gene                   |
| <i>ARL15</i>   | NM_019087.2    | AATGCCATCTTGAATGTAAAAGA<br>ACTTGGAGGGCTGATAACATC<br>CGGAAATACTGGAGCCGCTACT<br>ACCAAGGATCTCAAGGGGTAAT<br>ATTTGTATTAG    | 84               | 81               | 300047552;<br>200047552 | T2D gene                   |
| <i>BCAR1</i>   | NM_001170717.1 | CTGGCCCCGGGCACCCTGTACG<br>ATGTGCCCCCGTGAACGGGTGCT<br>TCCTCCTGAGGTGGCTGATGGT<br>GGCGTGGTCGACAGTGGTGTGT<br>ATGCGGTGCCTCC | 85               | 86               | 374085;<br>274085       | T2D gene                   |
| <i>BCL11A</i>  | NM_022893.3    | TACACATGTACAACCTGCAAACA<br>GCCATTACCAAGTGCATGGTTT<br>CTCTTGCAACACGCACAGAACA<br>CTCATGGATTAAGAATCTACTTA<br>GAAAGCGAAC   | 79               | 83               | 335334;<br>235334       | T2D gene                   |
| <i>BLK</i>     | NM_001715.2    | AGCTTCTTGCTCCAATCAACAAG<br>GCCGGCTCCTTTCTTATCAGAG<br>AGAGTGAAACCAACAAGGTGC<br>CTTCTCCCTGTCTGTGAAGGAT<br>GTCACCACCCA    | 78               | 81               | 304841;<br>204841       | Monogenic<br>diabetes gene |
| <i>C1orf43</i> | NM_015449.2    | ATTCGACTCTCCAGGGTTCAGG<br>ATATCAAGTATGAGCCCCAGCT<br>CCTTGCAGATGATGATGCTAGA<br>CTACTACAACCTGGAAACCCAGG<br>GAAATCAAAGTT  | 84               | 84               | 300000629;<br>200000629 | Housekeeping<br>gene       |

|                 |                       |                                                                                                                       |    |    |                         |                          |
|-----------------|-----------------------|-----------------------------------------------------------------------------------------------------------------------|----|----|-------------------------|--------------------------|
| <i>C2CD4A</i>   | NM_207322.2           | GCATTTTGTTTAAGACCCCGGAT<br>AAGAAAATGAGGGCAAAAGAGG<br>TGAAGTGAATTGTCCAAGATCA<br>ACAGTGAATTATTAGTTGGAACG<br>CCAGCCTGAT  | 81 | 80 | 310209;<br>210209       | T2D gene                 |
| <i>C2CD4B</i>   | NM_001007595.2        | AGGATGCGGCTCCTCGAGAAAC<br>TCTGTTCCCTCGGCCGAGGCAG<br>CTCCGCGCCGAAGCCCGCCTTC<br>GCCAAAGTGCTCACGCCGAATC<br>GCATCCCCGAAT  | 86 | 86 | 335228;<br>235228       | T2D gene                 |
| <i>CAMK1D</i>   | NM_020397.2           | AAAGAGACCCTCGGAACCGGG<br>GCCTTTTCCGAAGTGGTTTTAGC<br>TGAAGAGAAGGCAACTGGCAAG<br>CTCTTTGCTGTGAAGTGTATCCC<br>TAAGAAGGCGC  | 79 | 81 | 305079;<br>205079       | T2D gene                 |
| <i>CCND2</i>    | NM_001759.3           | TGTGAGGAACAGAAGTGCGAAG<br>AAGAGGTCTTCCCTCTGGCCAT<br>GAATTACCTGGACCGTTTCTTG<br>GCTGGGGTCCCAGACTCCGAAGT<br>CCCATCTGCAAC | 85 | 86 | 340263;<br>240263       | T2D gene                 |
| <i>CDC123</i>   | NM_006023.2           | TTGGTGAAGTCACAGATTCCT<br>GCTGTTCCACTGGGAAGAACTG<br>ATATCTGAGAACAACCTAAACGG<br>CGATTTTAGTGAAGTTGACGCTC<br>AAGAGCAGGA   | 83 | 81 | 300039699;<br>200039699 | T2D gene                 |
| <i>CDH16</i>    | NM_004062.2           | GCCACGTGAACACATAATCCCC<br>GTGGTGGTCAGCCACAATGCC<br>AGATGTGGCAGCTCCTGGTTCC<br>AGTGATCGTGTGTCGCTGCAAC<br>GTGGAGGGGCGAG  | 82 | 81 | 308452;<br>208452       | Marker of kidney         |
| <i>CDKAL1</i>   | NM_017774.2           | GGTCACTCTGTGAGACTGCTGG<br>GTCAGAAAAAGGATAATGGAAG<br>GCGGCTTGGGGGAGCACGATT<br>GGATTTGCCGAAGATTAGGAAG<br>AATCCAATGATAG  | 82 | 82 | 306459;<br>206459       | T2D gene                 |
| <i>CDKN2A</i>   | NM_000077.3           | AAGCGCACATTCATGTGGGCAT<br>TTCTTGCGAGCCTCGCAGCCTC<br>CGGAAGCTGTGCACTTCATGAC<br>AAGCATTTTGTGAAGTAGGGAA<br>GCTCAGGGGGGT  | 82 | 81 | 302810;<br>202810       | T2D gene                 |
| <i>CDKN2B</i>   | NM_004936.3           | CACTTGGGTGACGGCAGTCGAT<br>GCGTTCACTCCAATGTCTGCTG<br>AGGAGTTATGGTGAACCCACAA<br>CTTAGGCCCTAGCGGCAGAAAG<br>GAAAACCTGAAG  | 82 | 81 | 301731;<br>201731       | T2D gene                 |
| <i>CEL</i>      | NM_001807.3           | GGTTCGTGGAAGGCGTCAATAA<br>GAAGCTCGGCCCTCTGGGTGAC<br>TCTGTGGACATCTTCAAGGGCA<br>TCCCCTTCGCAGCTCCCACCAA<br>GGCCCTGGAAAA  | 85 | 84 | 348673;<br>248673       | Monogenic diabetes gene  |
| <i>CHCHD2P9</i> | ENST0000046172<br>6.1 | CTTCTATGGGATCAAACAGTTTC<br>TGGAGTGTGCCAGAACCAGG<br>GCGACATCAAGCTCTGTGAGGA<br>TTTCAGTAAGGTGCTGAAACAG<br>TGCCGACTTGCA   | 86 | 84 | 300093539;<br>200093539 | T2D gene                 |
| <i>CIDEA</i>    | NM_022094.2           | GACAAGGATGGAATACGCCATG<br>AAGTCCCTTAGCCTTCTCTACCC<br>CAAGTCCCTCTCCAGGCATGTG<br>TCAGTGCGTACCTCTGTGGTGA<br>CCCAGCAGCTG  | 84 | 85 | 343264;<br>243264       | Marker of adipose tissue |
| <i>CILP2</i>    | NM_153221.2           | CCGCTCCCAGCTCAGAAGCCGT<br>CTCTGACTTCTCGTGCATTTTT<br>GACCCTGATTTCAATCTTCTACC<br>CTTGGGAGTTCTGGCGTTTGGC<br>ACAAAGTCCC   | 83 | 79 | 300060271;<br>200060271 | T2D gene                 |
| <i>COBLL1</i>   | NM_014900.3           | AGTTTTTTTCAACGCAGTAAGAA<br>AAAGCGAGACCAAACCTGCAAGT<br>GCCCTGCAACCCCTCTAGTAA<br>ATAAGCACCGCCCAACTTTTACA<br>AGGTCCAATA  | 80 | 82 | 313525;<br>213525       | T2D gene                 |
| <i>DGKB</i>     | NM_004080.1           | TCCACTTCTGTGCTCCTGGGC<br>TTAGAAAATAACGTGAAGGATG<br>ATGGACAGCACGTGTGGCGACT<br>GAAGCACTTTAACAAACCTGCC<br>TATTGCAACCTT   | 78 | 79 | 302687;<br>202687       | T2D gene                 |

|              |                |                                                                                                                      |    |    |                         |                                          |
|--------------|----------------|----------------------------------------------------------------------------------------------------------------------|----|----|-------------------------|------------------------------------------|
| <i>DNER</i>  | NM_139072.3    | CCTCTACATCATCATTGGAGCC<br>CTCTGCGTGGCCTTCATCCTTAT<br>GCTGATCATCCTGATCGTGGGG<br>ATTTGCCGCATCAGCCGCATTG<br>AATACCAGGGT | 82 | 83 | 350100;<br>250100       | T2D gene                                 |
| <i>DUSP9</i> | NM_001395.2    | CCCATCTCCGACCACTGGAGCC<br>AGAACCTGTCGCGGTTCTTTCC<br>GGAGGCCATTGAGTTCATTGAT<br>GAGGCCTTGTCCCAGAACTGCG<br>GGGTGCTCGTCC | 85 | 84 | 347657;<br>247657       | T2D gene                                 |
| <i>FABP4</i> | NM_001442.2    | GGTGAATGCGTCATGAAAGGC<br>GTCACCTCCACGAGAGTTTATG<br>AGAGAGCATAAGCCAAGGGACG<br>TTGACCTGGACTGAAGTTCGCA<br>TTGAACTCTACA  | 83 | 83 | 311558;<br>211558       | Marker of<br>adipose tissue              |
| <i>FAF1</i>  | NM_007051.2    | GCTTTTCAAGAGGCCTTCTATGT<br>GAAAGCCCGAGATAGAAAGCTT<br>CTTGCTATCTACCTCCACCATGA<br>TGAAAGTGTGTTAACCAACGTG<br>TTCTGCTCAC | 81 | 80 | 314945;<br>214945       | T2D gene                                 |
| <i>FITM2</i> | NM_001080472.1 | CTTGTCCCAGAAGGTGTTGGC<br>ACCTTGTTTGGTTTGCTGAGCTG<br>GTACGGGACATACGGGTTTTGG<br>TATCCGAAAGCCTTTTCCCAG<br>GACTTCCTCCC   | 79 | 82 | 300022375;<br>200022375 | T2D gene                                 |
| <i>FOXP3</i> | NM_014009.3    | GGGCCATCCTGGAGGCTCCAG<br>AGAAGCAGCGGACACTCAATGA<br>GATCTACCACTGGTTCACACGC<br>ATGTTTGCCTTCTTCAGAAACCA<br>TCCTGCCACCTG | 81 | 79 | 310104;<br>210104       | Monogenic<br>diabetes gene               |
| <i>FTO</i>   | NM_001080432.2 | AAAGTGAGGATGACTCTCATCT<br>CGAAGGCAGGGATCCTGATATT<br>TGGCATGTTGGTTTTAAGATCTC<br>ATGGGACATAGAGACACCTGGT<br>TTGGCGATACC | 84 | 80 | 344638;<br>244638       | T2D gene                                 |
| <i>GATA4</i> | NM_002052.3    | GACTTCTTTCCCAAGATGTCCTT<br>GTCCCCTGCGTTCCCACCTGTG<br>GCCTAGACCGTGGGTTTTGCAT<br>TGTGTTTCTAGCACCGAGGATC<br>TGAGAACAAGC | 83 | 81 | 311568;<br>211568       | Monogenic<br>diabetes gene               |
| <i>GATA6</i> | NM_005257.3    | GACAGTGGCGACTGCGCTGACA<br>GAACGTGATTCTCGTGCCTTTAT<br>TTTAAAAGAGATGTTTTTCCCAA<br>GAGGCTTGCTGAAAGAGTGAGA<br>GAAGATGGAA | 80 | 83 | 311617;<br>211617       | Monogenic<br>diabetes gene               |
| <i>GCC1</i>  | NM_024523.5    | TACAGCAGGAAATGAGAAAGAC<br>AGCTCTTGCAGAGGATCAACTC<br>CGTCAGCAATCTCAGGTAGAAG<br>AACAGAGGGTGGCAGCCCTGG<br>AGAATCAAATATC | 82 | 81 | 300572;<br>200572       | T2D gene                                 |
| <i>GCG</i>   | NM_002054.2    | TGGACTCCAGGCGTGCCCAAGA<br>TTTTGTGCAGTGGTTGATGAATA<br>CCAAGAGGAACAGGAATAACAT<br>TGCCAAACGTCACGATGAATTT<br>GAGAGACATGC | 84 | 83 | 311569;<br>211569       | Marker of<br>pancreatic islet            |
| <i>GCK</i>   | NM_000162.3    | CCACCTTTCTCGCTGGAATCAAT<br>TTCCCAGAAGGGAGTTGCTCAC<br>TCAGGACTTTGATGCATTTCCAC<br>ACTGTCAGAGCTGTTGGCCTCG<br>CCTGGGCCCA | 82 | 83 | 311750;<br>211750       | T2D gene &<br>Monogenic<br>diabetes gene |
| <i>GCKR</i>  | NM_001486.3    | TGGGTGCTGAATACAGTGAGTA<br>CAGGTGCTCATGTGCTTCTTGG<br>TAAGATCCTACAAAACCATGT<br>TGGACCTTCGGATTAGCAACTC<br>CAAGCTCTTCT   | 84 | 82 | 349899;<br>249899       | T2D gene                                 |
| <i>GIPR</i>  | NM_000164.2    | CCCTGTCTCTCGCCACACTGCT<br>GCTAGCCCTGCTCATCTTGAGT<br>TTGTTCCAGGCGGCTACATTGCA<br>CTAGAAACTATATCCACATCAAC<br>CTGTTACGTC | 82 | 79 | 302954;<br>202954       | T2D gene                                 |
| <i>GLIS3</i> | NM_001042413.1 | CCCGGGACATCCATGTCCAGCA<br>ATAGTGTCTCTAACTCATTACCA<br>TCCTACCTTTTTGGCACGAAA<br>GTAGCCACTCTCCTTACCCTAGT<br>CCTCGGCACT  | 82 | 83 | 300021627;<br>200021627 | T2D gene &<br>Monogenic<br>diabetes gene |



|                |                |                                                                                                                       |    |    |                         |                                          |
|----------------|----------------|-----------------------------------------------------------------------------------------------------------------------|----|----|-------------------------|------------------------------------------|
| <i>GPSM1</i>   | NM_001145638.1 | GGCCACGGCGAGCCCCAGGAG<br>CCGGGGGACGACTTCTTCAACA<br>TGCTCATCAAGTACCAGTCCTC<br>CAGGATCGATGACCAGCGCTGC<br>CCGCCACCTGACG  | 84 | 84 | 374380;<br>274380       | T2D gene                                 |
| <i>GRB14</i>   | NM_004490.2    | ACAGCTGGACCCTTTTTGAGCA<br>CCTGCCTCACATAGGTGTAGAA<br>AGAACAATAGAAGACCACGAAC<br>TGGTGATTGAAGTGCTATCCAA<br>CTGGGGGATAGA  | 83 | 82 | 302690;<br>202690       | T2D gene                                 |
| <i>GRK5</i>    | NM_005308.2    | GTTCTCCACGGGCTCTGTGTCC<br>ATCCCATGGCAAACGAGATGA<br>TAGAAACAGAATGCTTTAAGGA<br>GCTGAACGTGTTTGGACCTAAT<br>GGTACCCTCCCG   | 79 | 78 | 303130;<br>203130       | T2D gene                                 |
| <i>HHEX</i>    | NM_002729.4    | GCACTATCACTTAGTACCTGTTT<br>GACCAAGGTGTTAAGGGGATAG<br>TACCTCCAATTCAAGCAGAGA<br>AACTGACCTGACTAAAGTTAATC<br>GCAGATGAAC   | 82 | 83 | 311692;<br>211692       | T2D gene                                 |
| <i>HLA-B</i>   | NM_005514.6    | CCCTGAGATGGGAGCCGCTCTTC<br>CCAGTCCACCGTCCCCATCGTG<br>GGCATTGTTGCTGGCCTGGCTG<br>TCCTAGCAGTTGTGGTCATCGG<br>AGCTGTGGTCCG | 86 | 86 | 329226;<br>229226       | T2D gene                                 |
| <i>HMG20A</i>  | NM_018200.2    | TATACATCTCCATTTTCTGACCT<br>CTGGACTAACTGGTTGCTCAGC<br>AAGGTTCTGAAGGAGAGTTTCT<br>TGCATTGGACAGGCCAGTCTT<br>CTCCCATCATT   | 81 | 80 | 348437;<br>248437       | T2D gene                                 |
| <i>HMGA2</i>   | NM_003484.1    | GAGGAGGAATTCTTTCCCGCC<br>TAACATTTCAAGGGACACAATTC<br>ACTCCAAGTCTCTTCCCTTTCCA<br>AGCCGCTTCCGAAGTGCTCCCG<br>GTGCCCGCAA   | 81 | 85 | 370307;<br>270307       | T2D gene                                 |
| <i>HNF1A</i>   | NM_000545.4    | GGGGGTCGTGGAGAGCTAGGA<br>GCAAAGCCTGTTTCATGGCAGAT<br>GTAGGAGGGACTGTCGCTGCTT<br>CGTGGGATACAGTCTTCTTACTT<br>GGAAGTGAAGGG | 82 | 82 | 310561;<br>210561       | T2D gene &<br>Monogenic<br>diabetes gene |
| <i>HNF1B</i>   | NM_000458.1    | ACGTCCTGCTGGCACCTCAGAC<br>AATCCACTCTCAGGAGCGCAGC<br>CCGAAGCCCAGTTTCCCTTCTAT<br>GCAGTATTGCCACAATGCCTCT<br>CCCACGATGTC  | 82 | 79 | 300034;<br>200034       | T2D gene &<br>Monogenic<br>diabetes gene |
| <i>HNF4A</i>   | NM_178850.1    | CCTTGACAGCATCACCTGGCA<br>GATGATCGAGCAGATCCAGTTC<br>ATCAAGCTCTTCGGCATGGCCA<br>AGATTGACAACCTGTTGCAGGA<br>GATGCTGCTGGG   | 83 | 83 | 360741;<br>260741       | T2D gene &<br>Monogenic<br>diabetes gene |
| <i>IAPP</i>    | NM_000415.1    | ATTCTCTCATCTACCAACGTGGG<br>ATCCAATACATATGGCAAGAGG<br>AATGCAGTAGAGTTTTAAAGA<br>GAGAGCCACTGAATTACTTGCC<br>CCTTTAGAGGA   | 83 | 81 | 311536;<br>211536       | Marker of<br>pancreatic islet            |
| <i>IDE</i>     | NM_004969.3    | AACTGATCGCACAGAAGAGTG<br>GTATGGAACCCAGTACAAACAA<br>GAAGCTATACCGGATGAAGTCA<br>TCAAGAAATGGCAAATGCTGA<br>CCTGAATGGGAA    | 83 | 83 | 300039130;<br>200039130 | T2D gene                                 |
| <i>IER3IP1</i> | NM_016097.3    | GGGAACAGACCAGGGAATTGGT<br>GGATTTGGAGAAGAGCCGGGAA<br>TTAAATCACAGCTAATGAACCTT<br>ATTCGATCTGTAAGAACCGTGAT<br>GAGAGTGCCA  | 84 | 81 | 343083;<br>243083       | Monogenic<br>diabetes gene               |
| <i>IGF2</i>    | NM_001127598.1 | ACACACACTCATGCGCAGCACA<br>TACATGAACACAGCTCACAGCA<br>CACAAACACGCAGCACACACGT<br>TGACACGCAAGCACCCACCTG<br>CACACACACATG   | 87 | 88 | 322178;<br>222178       | T2D gene                                 |
| <i>IGF2BP2</i> | NM_001007225.1 | GAACAAAAGCGAAACACACAAA<br>CCAGCCTCAACTTACACTTGGTT<br>ACTCAAAAAGAACAAGAGTCAAT<br>GGTACTTGTCTAGCGTTTTGG<br>AAGAGGAAAAC  | 84 | 81 | 366890;<br>266890       | T2D gene                                 |

|               |                |                                                                                                                       |    |    |                         |                                                                             |
|---------------|----------------|-----------------------------------------------------------------------------------------------------------------------|----|----|-------------------------|-----------------------------------------------------------------------------|
| <i>INS</i>    | NM_000207.2    | GGGTCCCTGCAGAAGCGTGCC<br>ATTGTGGAACAATGCTGTACCA<br>GCATCTGCTCCCTCTACCAGCT<br>GGAGAACTACTGCAACTAGACG<br>CAGCCCCGAGGCA  | 85 | 86 | 350253;<br>250253       | T2D gene &<br>Monogenic<br>diabetes gene &<br>Marker of<br>pancreatic islet |
| <i>INSM1</i>  | NM_002196.2    | AAGCCTCCCCTTGCCGGGGAG<br>AAGCTTTTTTCTTGCTAGTATT<br>CGCTGTGTTTCATGGTCTAGAAAT<br>GCGGTCTGGTCTCGCCTCGCCT<br>ACCAATCTCTG  | 79 | 83 | 311571;<br>211571       | Marker of<br>pancreatic islet                                               |
| <i>IRS1</i>   | NM_005544.2    | CCCTGGGCAGCGGTGAGAGCA<br>GCTCCACCCGCCGCTCAAGTGA<br>GGATTTAAGCGCCTATGCCAGC<br>ATCAGTTTCCAGAAGCAGCCAG<br>AGGACCGTCAGTA  | 83 | 83 | 300093750;<br>200093750 | T2D gene                                                                    |
| <i>ISL1</i>   | NM_002202.2    | CTTACAGGCTAACCCAGTGGAA<br>GTACAAAGTTACCAGCCACCTT<br>GGAAAGTACTGAGCGACTTCGC<br>CTTGACAGAGTGACATAGATCAG<br>CCTGCTTTTCAG | 79 | 83 | 308799;<br>208799       | Marker of<br>pancreatic islet                                               |
| <i>JAZF1</i>  | NM_175061.3    | CCTGGACCACAGAGAGTGCCAT<br>CAGCTCCGAAGCCATCCTCAGC<br>TCCATGTGCATGAATGGAGGGG<br>AAGAGAAGCCTTTTGCCTGCC<br>AGTTCCTGGATG   | 82 | 82 | 310734;<br>210734       | T2D gene                                                                    |
| <i>KCNJ11</i> | NM_000525.3    | CTCATCCAGGGTGTTACAAGGC<br>ACTTGTCACTATGCTATTTCTGG<br>CCTCAGCAGGAACCTGTACTGG<br>GTTATTTTTGTCCCTGCTCCTCC<br>CAACCCAATT  | 81 | 81 | 349841;<br>249841       | T2D gene &<br>Monogenic<br>diabetes gene                                    |
| <i>KCNK16</i> | NM_001135105.1 | CTGGTCATTCTCATCTTCCCACC<br>CATGGTCTTCAGCCATGTGGAG<br>GGCTGGAGCTTCAGCGAGGGC<br>TTCTACTTTGCTTTCATCACTCT<br>CAGCACCATTG  | 83 | 80 | 300029232;<br>200029232 | T2D gene                                                                    |
| <i>KCNQ1</i>  | NM_181798.1    | CAGACGTGGGTCGGGAAGACC<br>ATCGCCTCCTGCTTCTCTGCTT<br>TGCCATCTCCTTCTTTGCGCTCC<br>CAGCGGGGATTCTTGGCTCGGG<br>GTTTGGCCCTGA  | 83 | 83 | 311680;<br>211680       | T2D gene                                                                    |
| <i>KLF11</i>  | NM_001177716.1 | TCATCACCTCTAGCCAAAAGTGT<br>GTCCCTCAGGTAGACTTTTCCC<br>GAAGGAGGAACTATGTTTGCAG<br>CTTCCCAGGTTGCCGGAAGACC<br>TACTTCAAAG   | 83 | 83 | 349892;<br>249892       | Monogenic<br>diabetes gene                                                  |
| <i>KLF14</i>  | NM_138693.2    | CAGGCCGTTGTCCCTGCTTTCT<br>CTCTGCCCATCCTTCTTTCCCAG<br>AGTCATTACACCAAGGCACAGA<br>CTGGTTCCTCTGCTCTGAGGGT<br>GGTCCAGGCA   | 80 | 86 | 349984;<br>249984       | T2D gene                                                                    |
| <i>KLHDC5</i> | NM_020782.1    | CCACCGCTTTTTAAGGAGGCA<br>TTATGAATGAGTGCAGCATTCT<br>GTCCTCTGTGCCAGGATTTGGT<br>CTTAGAATCCATGTCAGATTGGT<br>GCTTCCAGAC    | 78 | 79 | 300533;<br>200533       | T2D gene                                                                    |
| <i>LAMA1</i>  | NM_005559.2    | CAGTTGCACCAAAATGCCACCC<br>TTGAACTCAAGGCTGCTGAAGA<br>TTTATTGTACAAATTCAGGAAA<br>ATTACCAGAAGCCGCTGGAAGA<br>ATTGGAGGTAT   | 81 | 82 | 311620;<br>211620       | T2D gene                                                                    |
| <i>LEP</i>    | NM_000230.2    | GTAGTTCTTGTCTGATTGGCTCA<br>CCCAAGCAAGGCCAAAATTACC<br>AAAAATCTTGGGGGGTTTTACT<br>CCAGTGGTGAAGAAAATCCTT<br>TAGCAGGTGG    | 80 | 81 | 316749;<br>216749       | T2D gene                                                                    |
| <i>LGALS4</i> | NM_006149.3    | AGAAGATCACCCACAACCCATT<br>TGGTCCCGGACAGTTCTTTGAT<br>CTGTCCATTGCTGTGGCTTGG<br>ATCGCTTCAAGGTTTACGCCAAT<br>GGCCAGCACCT   | 82 | 84 | 344872;<br>244872       | Marker of gut                                                               |
| <i>LGR5</i>   | NM_003667.2    | CTTATGCTTACCAGTGTGTGCA<br>TTTGGAGTGTGTGAGAATGCCT<br>ATAAGATTTCTAATCAATGGAAT<br>AAAGGTGACAACAGCAGTATGG<br>ACGACCTTCA   | 79 | 79 | 344720;<br>244720       | T2D gene                                                                    |

|                 |                |                                                                                                                       |    |    |                         |                                                               |
|-----------------|----------------|-----------------------------------------------------------------------------------------------------------------------|----|----|-------------------------|---------------------------------------------------------------|
| <i>LIPF</i>     | NM_001198828.1 | AGAAGCAGCTACACTATGTTGG<br>CCATTCCCAGGGCACCACCATT<br>GGTTTTATTGCCTTTTCCACCAA<br>TCCCAGCCTGGCTAAAAGAATC<br>AAAACCTTCTA  | 84 | 79 | 387771;<br>287771       | Marker of gut                                                 |
| <i>LPP</i>      | NM_005578.2    | GCTGTATGACATGGAAAATCCA<br>CCTGCTGACGAATACTTTGGCC<br>GCTGTGCTCGCTGTGGAGAAAA<br>CGTAGTTGGGAAGGTACAGGA<br>TGCACTGCCATG   | 81 | 82 | 308346;<br>208346       | T2D gene                                                      |
| <i>MACF1</i>    | NM_012090.5    | CATGGATGAAAAGGAGCAGCTT<br>ATACAGTCCAAGAGTTCCGTTG<br>CCAGTCTCGTTGGGAGATCAAA<br>AACCATCGTTCAGCTAAAACCA<br>CGCAGTCCAGAC  | 83 | 83 | 300043617;<br>200043617 | T2D gene                                                      |
| <i>MAEA</i>     | NM_001017405.2 | CCCTGCCCATGGCCCACTGTGC<br>CAACTCCCGCCTGGTCTGCAAG<br>ATTTCTGGCGACGTGATGAACG<br>AGAACAATCCGCCCATGATGCT<br>GCCAACGGCTA   | 83 | 83 | 300089574;<br>200089574 | T2D gene                                                      |
| <i>MAFA</i>     | NM_201589.2    | AGCTGCCCAGCAGCCCGCTGG<br>CCATCGAGTACGTAACGACTT<br>CGACCTGATGAAGTTCGAGGTG<br>AAGAAGGAGCCTCCCGAGGCC<br>GAGCGCTTCTGCCA   | 85 | 86 | 311743;<br>211743       | Marker of<br>pancreatic islet                                 |
| <i>MC4R</i>     | NM_005912.1    | TGGAGGGTGCTACGAGCAACTT<br>TTGTCTCTCCTGAGGTGTTTGT<br>GACTCTGGGTGTCATCAGCTTG<br>TTGGAGAATATCTTAGTGATTGT<br>GGCAATAGCC   | 80 | 78 | 303291;<br>203291       | T2D gene                                                      |
| <i>MXN1</i>     | NM_005515.3    | CCTGGGCGCTTCCCTTTTAAAGC<br>AAGGGCGCCTCACCTGCTCTTC<br>AAGAAACAGCGAGAGGGAGAC<br>CCAGGGGGCTGAAACTTGAACT<br>CTGGTTCTTTTAA | 80 | 82 | 310646;<br>210646       | Monogenic<br>diabetes gene                                    |
| <i>MOB2</i>     | NM_053005.3    | CCACATCAACCTGCAGTATAGC<br>ACCATCTCGGAGTTCTGCACAG<br>GAGAGACGTGTCAGACGATGGC<br>CGTGTGCAACACACAGTACTAC<br>TGGTATGACGAG  | 84 | 84 | 340815;<br>240815       | T2D gene                                                      |
| <i>MPHOSPH9</i> | NM_022782.3    | AGCCTGGGAGAAGAATAAATCA<br>GTTAGCTACGAACAGTGTAAAGC<br>CGGTTTCAGTCACTCCACAGGG<br>GAATGATTTTGAATATACAGCAA<br>AAATTCGGACC | 83 | 80 | 300049787;<br>200049787 | T2D gene                                                      |
| <i>MTNR1B</i>   | NM_005959.3    | ATCCCTGAGGGGCTATTTGTCA<br>CTAGCTACTTACTGGCTTATTTT<br>AACAGCTGCCTGAATGCCATTG<br>TCTATGGGCTCTTGAACCAAAA<br>CTTCCGCAGGG  | 78 | 79 | 302238;<br>202238       | T2D gene                                                      |
| <i>NEUROD1</i>  | NM_002500.2    | GTGCCCAGCTCAATGCCATATTT<br>CATGATTAGAGGCACGCCAGTT<br>TCACCATTTCCGGGAAACGAAC<br>CCACTGTGCTTACAGTACTGT<br>CGTGTTTACAA   | 81 | 79 | 311578;<br>211578       | Monogenic<br>diabetes gene &<br>Marker of<br>pancreatic islet |
| <i>NEUROG3</i>  | NM_020999.2    | CGCGCGAAGTGGGCATTGCAAA<br>GTGCGCTCATTTTAGGCCTCCT<br>CTCTGCCACCACCCATAATCT<br>CATTCAAAGAATACTAGAATGGT<br>AGCACTACCCG   | 83 | 82 | 311658;<br>211658       | Monogenic<br>diabetes gene                                    |
| <i>NKX2-2</i>   | NM_002509.3    | TAATTATTATTATGGAGTCGAGT<br>TGACTCTCGGCTCCACTAGGGA<br>GGCGCCGGGAGGTTGCCTGCG<br>TCTCCTTGGAGTGGCAGATTCC<br>ACCCACCCAGCT  | 82 | 83 | 383978;<br>283978       | Monogenic<br>diabetes gene                                    |
| <i>NKX6-1</i>   | NM_006168.2    | CTGGCCTGTACCCCTCATCAAG<br>GATCCATTTTGTGGACAAAGAC<br>GGGAAGAGAAAACACACGAGAC<br>CCACTTTTTCCGGACAGCAGAT<br>CTTCGCCCTGG   | 84 | 83 | 311629;<br>211629       | Marker of<br>pancreatic islet                                 |
| <i>NOTCH2</i>   | NM_024408.3    | AAGAGTCACCAAATTTTGAGAGT<br>TATACTTGCTTGTGTGCTCCTGG<br>CTGGCAAGGTGACGGGTGTACC<br>ATTGACATTGACGAGTGTATCTC<br>CAAGCCCTG  | 79 | 83 | 347789;<br>247789       | T2D gene                                                      |

|               |                |                                                                                                                       |    |    |                         |                                                                             |
|---------------|----------------|-----------------------------------------------------------------------------------------------------------------------|----|----|-------------------------|-----------------------------------------------------------------------------|
| <i>PAM</i>    | NM_000919.2    | TCATATATACCAGGCTTGCTCTT<br>TGCAGTGAATGGGAAGCCTCAT<br>TTTGGGGACCAAGAACCTGTAC<br>AAGGATTTGTGATGAACTTTTCC<br>AATGGGGAAA  | 79 | 82 | 335097;<br>235097       | T2D gene                                                                    |
| <i>PAX4</i>   | NM_006193.2    | TGTCCAGCCCTCTTTGCCTGGG<br>AAATCCAACGCCAGCTTTGTGC<br>TGAAGGGCTTTGCACCCAGGAC<br>AAGACTCCCAGTGTCTCCTCCA<br>TCAACCGAGTCC  | 83 | 84 | 300039793;<br>200039793 | T2D gene &<br>Monogenic<br>diabetes gene                                    |
| <i>PAX6</i>   | NM_000280.3    | GAACATCCTTTACCCAAGAGCA<br>AATTGAGGCCCTGGAGAAAGAG<br>TTTGAGAGAACCCATTATCCAGA<br>TGTGTTTGCCCGAGAAAGACTA<br>GCAGCCAAAAT  | 84 | 83 | 366937;<br>266937       | Marker of<br>pancreatic islet                                               |
| <i>PCBD1</i>  | NM_000281.2    | GGGCTGTGGGGTGAATGAGC<br>TGGAAGGCCGTGATGCCATCTT<br>CAAGCAGTTTCATTTCAAAGACT<br>TCAACAGGGCCTTTGGGTTTCAT<br>GACAAGAGTGGC  | 83 | 78 | 300015261;<br>200015261 | Monogenic<br>diabetes gene                                                  |
| <i>PDX1</i>   | NM_000209.3    | TGACCTCTTTCTTCTCCTCCTC<br>CTCCTTCTACCTCCCCTTCTCAT<br>CCCTCCTCTTCTTCTCTAGC<br>TGCACACTTCACTACTGCACATC<br>TTATAACT      | 78 | 79 | 311526;<br>211526       | T2D gene &<br>Monogenic<br>diabetes gene &<br>Marker of<br>pancreatic islet |
| <i>PEPD</i>   | NM_000285.3    | ACGATCCAGAATGGGGATATGT<br>GCCTGTTGACATGGGCGGTGA<br>GTATTACTGCTTCGCTTCCGACA<br>TCACCTGCTCCTTTCCCGCCAA<br>CGGCAAGTTCA   | 83 | 82 | 300015263;<br>200015263 | T2D gene                                                                    |
| <i>PLIN1</i>  | NM_001145311.1 | CATCTCCACCCGCCTCCGCAGT<br>GCCAGAAACAGCATCAGCGTTC<br>CCATCGCGAGCACTTCAAGACAA<br>GGTCTGGGGGCCGCTTTGGC<br>CGGGTGGAGCTT   | 82 | 84 | 362927;<br>262927       | Marker of<br>adipose tissue                                                 |
| <i>POU5F1</i> | NM_002701.4    | AAGTTCTTCACTAAGGAAG<br>GAATTGGGAACACAAGGGTGG<br>GGGCAGGGGAGTTTGGGGCAA<br>CTGTTGGAGGGAAGGTGAAGT<br>TCAATGATGCTC        | 78 | 82 | 308193;<br>208193       | T2D gene                                                                    |
| <i>PPARG</i>  | NM_015869.3    | GAGCAAAGAGGTGGCCATCCG<br>CATCTTTCAGGGCTGCCAGTTT<br>CGCTCCGTGGAGGCTGTGCAG<br>GAGATCACAGAGTATGCCAAAA<br>GCATTCTGGTTTT   | 81 | 81 | 300811;<br>200811       | T2D gene                                                                    |
| <i>PRC1</i>   | NM_199413.1    | ACAGAAAGTCTGCTCCAGCTCC<br>ACGATGCTGAGATTGTGCGGTT<br>AAAAAATACTATGAAGTTCACA<br>AGGAACTCTTTGAAGGTGTCCA<br>GAAGTGGGAAG   | 84 | 82 | 336825;<br>236825       | T2D gene                                                                    |
| <i>PROX1</i>  | NM_002763.3    | TCTCCTTGTCGCTCATAAAGTCC<br>GAGTGCGGCGATCTTCAAGATA<br>TGTCTGAAATATCACCTTATTCG<br>GGAAGTGCAATGCAGGAAGGAT<br>TGTCACCCAA  | 79 | 82 | 311583;<br>211583       | T2D gene                                                                    |
| <i>PSMB2</i>  | NM_002794.4    | AGCAATATTGTCCAGATGAAGG<br>ACGATCATGACAAGATGTTTAAG<br>ATGAGTGAAAAGATATTACTCCT<br>GTGTGTTGGAGAGGCTGGAGAC<br>ACTGTACAGT  | 79 | 85 | 300093536;<br>200093536 | Housekeeping<br>gene                                                        |
| <i>PSMB4</i>  | NM_002796.2    | GGACACAGCTATAGTCCTAGAG<br>CTATTCATTCATGGCTGACCAG<br>GGCCATGTACAGCCGGCGCTC<br>GAAGATGAACCCCTTTGTGGAAC<br>ACCATGGTCATCG | 87 | 86 | 300093534;<br>200093534 | Housekeeping<br>gene                                                        |
| <i>PSMD6</i>  | NM_001271780.1 | ATAGGTCATTAACCCTTGGCTAT<br>ATGGCAGAAGCGTTTGGTGTG<br>GTGTGGAATTCATTGATCAGGA<br>ACTGTCCAGTTTATTGCTGCC<br>GGGAGACTACA    | 79 | 81 | 365106;<br>265106       | T2D gene                                                                    |
| <i>PTF1A</i>  | NM_178161.2    | CAACAGCAAATCTTCTTCAACA<br>ACATAGAAAACGAACCACCATTT<br>GAGTTTGTGTCCTGAGAAGTCC<br>CAGACTCGGCTGAAGATCTGAT<br>TATGTCTCTG   | 78 | 82 | 311732;<br>211732       | Monogenic<br>diabetes gene                                                  |

|                 |                |                                                                                                                       |    |    |                         |                                                               |
|-----------------|----------------|-----------------------------------------------------------------------------------------------------------------------|----|----|-------------------------|---------------------------------------------------------------|
| <i>PTPRD</i>    | NM_001040712.2 | TTTTAGTTAAACAAAGGGGGTCA<br>GACAGACATTGCATCATCCAGA<br>CATGCCTTGTTGGACATGTAGA<br>ATCCGATGGAGCACTGCACACC<br>AGAATGATTGG  | 80 | 84 | 341816;<br>241816       | T2D gene                                                      |
| <i>R3HDML</i>   | NM_178491.2    | CCAGGTACCGCCGGAAGCGCC<br>ACATCTCTGTGAGAGACATGAA<br>TGCCTTACTGGATTATCACAACC<br>ACATCCGGGCCAGTGTGTACCC<br>ACCTGCCGCCAA  | 84 | 84 | 325372;<br>225372       | T2D gene                                                      |
| <i>RASGRP1</i>  | NM_005739.3    | ACGATCTCATTGACAGCTGCATT<br>CAATCTTTTGATGCAGATGGAAA<br>CCTGTGTGCGAAGTAACCAACTG<br>TTGCAAGTCATGCTGACCATGC<br>ACCGAATTGT | 78 | 82 | 335283;<br>235283       | T2D gene                                                      |
| <i>RBM43</i>    | NM_198557.2    | CAGCAATATAGTCATAAGGGCT<br>GCTTTCTCTTGCTGAGCAGTGA<br>CCATTGCCATGAATGAGGCTAG<br>CTTTACACACCGTATCTCATGAA<br>TCCTTATAGTC  | 81 | 78 | 355924;<br>255924       | T2D gene                                                      |
| <i>RBMS1</i>    | NM_016839.2    | ATCTGTCACTAGGCAGCACCGG<br>AACATACATGCCTGCAACGTCA<br>GCTATGCAAGGAGCCTACTTGC<br>CACAGTATGCACATATGCAGAC<br>GACAGCGGTTCC  | 82 | 82 | 309308;<br>209308       | T2D gene                                                      |
| <i>RFX6</i>     | NM_173560.2    | AGCAGTGCATATTACCACTCCG<br>TTTATTCTGGAAAGGGCTTGACA<br>AGGTTTTCTGGAAGCAAGCTAA<br>AGAATGAGGGTGGCTTCACTCG<br>TAAATATTCCG  | 80 | 82 | 336282;<br>236282       | Monogenic<br>diabetes gene &<br>Marker of<br>pancreatic islet |
| <i>RND3</i>     | NM_005168.3    | GGAACAAATCACAGAGGCCAC<br>AAAGCGGATTTACACATGCCT<br>AGCAGACCAGAACTCTCGGCAG<br>TTGCTACGGACTTACGAAAGGA<br>CAAAGCGAAGAG    | 82 | 80 | 308797;<br>208797       | T2D gene                                                      |
| <i>RREB1</i>    | NM_001003698.2 | TTCGAACACATCGAGGACTGCT<br>GCGTCACAACGCGCTTGCCAC<br>AAACAACCTCCAGGGATGCAA<br>TGGGCAGACCTTTCATACAGAA<br>CAACCCTTCAAT    | 79 | 80 | 310505;<br>210505       | T2D gene                                                      |
| <i>SFTPA2</i>   | NM_001098668.2 | CCATCTCTCCAGCTAGCAAAATT<br>ACTACCAGAGCCGTTACTACAC<br>ACAAAGGCTATTGACCGAGCAC<br>ATACCATGTGCCACACACCTTG<br>ACAAAATCTTT  | 83 | 83 | 390536;<br>290536       | Marker of lung                                                |
| <i>SFTPB</i>    | NM_000542.3    | CACACACAGGATCTCTCCGAGC<br>AGCAATTCCTTCTCTCCCC<br>TATTGCTGGCTCTGCAGGGCTC<br>TGATCAAGCGGATCCAAGCCAT<br>GATCCCAAGG       | 83 | 86 | 344205;<br>244205       | Marker of lung                                                |
| <i>SFTPC</i>    | NM_003018.2    | TTCCCTGCTGCCAGTGCACCT<br>GAAACGCCTTCTTATCGTGGTG<br>GTGGTGGTGGTCCCTCATCGTCG<br>TGGTGATTGTGGGAGCCCTGCT<br>CATGGGTCTCCA  | 81 | 81 | 301927;<br>201927       | Marker of lung                                                |
| <i>SGCG</i>     | NM_000231.2    | ACACTGAGTGTTGAGTTGCCGT<br>GTGGAGTTAATGTATGACGCTC<br>CACTGTGGATATCTAATGCCCT<br>GTTGAGAGTAGCCTTGCTCAGT<br>ACTAAAATGCC   | 82 | 84 | 345859;<br>245859       | T2D gene                                                      |
| <i>SLC12A1</i>  | NM_000338.2    | CCAAGTTCGACTGAATGAACTC<br>TTACAGGAGCACTCCAGAGCTG<br>CTAATCTCATTGTCCTGAGCCTT<br>CCCCTGGCAAGAAAGGGATCCA<br>TATCGGATTG   | 83 | 81 | 300015293;<br>200015293 | Marker of kidney                                              |
| <i>SLC16A11</i> | NM_153357.1    | CGGCCTGAGTCTGTTACACGCG<br>CGGGCCTTCTCAATCTTTGCTCT<br>AGGCACAGCCCTGGTTGGGGG<br>CGGGTACTTCGTTCCCTTACGTG<br>CACTTGGCTCCC | 82 | 83 | 365403;<br>265403       | T2D gene                                                      |
| <i>SLC16A13</i> | NM_201566.2    | GGTGCTCTCAGCGTTCTTCCAG<br>TCGGCGCTTGTGTTTGGGGTGC<br>TCCGCTCCTTTGGGGTCTTCTTC<br>GTGGAGTTTGTGGCGGCGTTTG<br>AGGAGCAGGCA  | 84 | 82 | 365405;<br>265405       | T2D gene                                                      |

|                |                |                                                                                                                       |    |    |                         |                                             |
|----------------|----------------|-----------------------------------------------------------------------------------------------------------------------|----|----|-------------------------|---------------------------------------------|
| <i>SLC19A2</i> | NM_006996.1    | CCTGTGGGAGAAAGTGATGCCT<br>TCTCGCTATGCTGCTATCTATAA<br>TGGTGGCGTGGAGGCCGTTTCA<br>ACCTTACTGGGTGCTGTTGCTG<br>TGTTTGCACTT  | 80 | 80 | 300323;<br>200323       | Monogenic<br>diabetes gene                  |
| <i>SLC22A2</i> | NM_003058.2    | CTAACATCTGGCTTGAGCTCCC<br>GCTGATGGTTTTCGGCGTGCTT<br>GGCTTGGTTGCTGGAGGTCTGG<br>TGCTGTTGCTTCCAGAACTAAA<br>GGGAAAGCTTT   | 82 | 84 | 320257;<br>220257       | Marker of kidney                            |
| <i>SLC2A2</i>  | NM_000340.1    | CAATTATGGAATATAGTTCTGA<br>TGGGTCCCAAAGCTTAGCAGG<br>GTGCTAACGTATCTCTAGGCTG<br>TTTTCTCCACCAACTGGAGCACT<br>GATCAATCCT    | 81 | 82 | 311532;<br>211532       | Monogenic<br>diabetes gene                  |
| <i>SLC30A8</i> | NM_173851.2    | CAGATGCAACCAATTCATTCAGT<br>CCACGAGCATGATGTGAGCACT<br>GCTTTGTGCTAGACATTGGGCT<br>TAGCATTGAAACTATAAAGAGGA<br>ATCAGACGCA  | 80 | 83 | 349995;<br>249995       | T2D gene &<br>Marker of<br>pancreatic islet |
| <i>SPRY2</i>   | NM_005842.2    | GCCGTTTTAACTGATATGCTTGT<br>TAGAACTCAGCTAATGGAGCTC<br>AAAGTATGAGATACAGAACTTG<br>GTGACCCATGTATTGCATAAGC<br>TAAAGCAACAC  | 77 | 84 | 368417;<br>268417       | T2D gene                                    |
| <i>SRR</i>     | NM_021947.1    | ACAATTGCCCTGGAAGTGCTGA<br>ACCAGGTTCCCTTTGGTGGATGC<br>ACTGGTGGTACCTGTAGGTGGA<br>GGAGGAATGCTTGCTGGAATAG<br>CAATTACAGTTA | 82 | 81 | 301964;<br>201964       | T2D gene                                    |
| <i>SSR1</i>    | NM_003144.3    | ACATTGCCTGGGTCTCAGTAAG<br>CCGCTTAAGTGACTGCTCTCATT<br>TTCGCTGTAAAGCACCATACTGT<br>AATAACATCCCATGAAGCATGG<br>GGCGGGGAAG  | 79 | 81 | 308324;<br>208324       | T2D gene                                    |
| <i>SST</i>     | NM_001048.3    | AGCTGCTGTCTGAACCCAACCA<br>GACGGAGAATGATGCCCTGGAA<br>CCTGAAGATCTGTCCAGGCTG<br>CTGAGCAGGATGAAATGAGGCT<br>TGAGCTGCAGAG   | 82 | 82 | 301249;<br>201249       | Marker of<br>pancreatic islet               |
| <i>ST6GAL1</i> | NM_003032.2    | ATGATGACGCTGTGTGACCAGG<br>TGGATATTTATGAGTTCCTCCA<br>TCCAAGCGCAAGACTGACGTGT<br>GCTACTACTACCAGAAGTTCTTC<br>GATAGTGCCT   | 81 | 82 | 361087;<br>261087       | T2D gene                                    |
| <i>TBC1D4</i>  | NM_014832.2    | GCAGTTTCTGGCTTTACAGTACC<br>GACTCAGACACAGATTGCCTAA<br>TAAACAACAGCCTCCTGACATAT<br>CCTATAAGGAACTTTTGAAGCA<br>GCTCACTGCT  | 81 | 83 | 344936;<br>244936       | T2D gene                                    |
| <i>TCF19</i>   | NM_001077511.1 | TTGCAAGTCGGCTTAACCAATTT<br>TGCATTGAGTCCTAGGCTGCTT<br>GCACTCTGAATTTGGGCTATTCA<br>GGTAGTGTGCTCAAAGTTGAAA<br>CCGCATACAG  | 79 | 79 | 300022149;<br>200022149 | T2D gene                                    |
| <i>TCF7L2</i>  | NM_001146274.1 | ATATGGTCCCACCACATCATA<br>GCTACACACGACGGCATTCCG<br>CATCCGGCCATAGTCACACCAA<br>CAGTCAAACAGGAATCGTCCCA<br>GAGTGATGTCGG    | 86 | 86 | 362160;<br>262160       | T2D gene                                    |
| <i>THADA</i>   | NM_001083953.1 | CCAGAATCTTCTGATGGATTATT<br>GACGGTGGAGCAGGTAAAAGAA<br>ATAGGAGATTACTTTAACAACA<br>CCTTTTGCAGTCCAGGCACAGA<br>GGAGCATTTG   | 81 | 78 | 329955;<br>229955       | T2D gene                                    |
| <i>TLE1</i>    | NM_005077.3    | CCGACTCACATGACAGCCATT<br>CTTTCTTTCTGGGTGATCTGGG<br>GATCACGCCTTGCCCAAGTGTG<br>AGATTACCTTTCTGTTCTTGCA<br>GTTACCTCAC     | 82 | 79 | 311859;<br>211859       | T2D gene                                    |
| <i>TLE4</i>    | NM_007005.3    | AAAACAAGGACAGCAGAGGAGG<br>GTTTGCAGAGACCTCCCTCTGA<br>AAAACAAAAGAATGGACTCTCT<br>CCTGGGATGAGGACTTGCTTTC<br>TTTACCTCCGG   | 81 | 79 | 309013;<br>209013       | T2D gene                                    |

|                 |                |                                                                                                                        |    |    |                         |                                          |
|-----------------|----------------|------------------------------------------------------------------------------------------------------------------------|----|----|-------------------------|------------------------------------------|
| <i>TMEM154</i>  | NM_152680.2    | GCGCAGCCCTAGTCTTCGCCCT<br>GGTGATCGCGCTCGTTCCCGTC<br>GGCCGGGGTAATTATGAGGAAT<br>TAGAAAACCTCAGGAGATACAAC<br>TGTGGAATCTGA  | 85 | 81 | 373634;<br>273634       | T2D gene                                 |
| <i>TMEM163</i>  | NM_030923.4    | TGGGGGTGATATTCCTTCTGTC<br>ATCCATATGTATAGTGGTCAAAG<br>CCATCCATGACCTCTCAACTAG<br>GCTGCTCCCAGAAGTGGACGAT<br>TTCCTGTTCCAG  | 79 | 83 | 388351;<br>288351       | T2D gene                                 |
| <i>TP53INP1</i> | NM_033285.3    | CCAAGAGCTTTCCGCCCTTCCCA<br>GTGGATAAAAAGAACACAGTGAA<br>AGACAGCCTCTTAACAGAAATA<br>GCCTTCGTCGCCAAAATCTTAC<br>CAGGGATTGCCA | 83 | 80 | 348825;<br>248825       | T2D gene                                 |
| <i>TRMT10A</i>  | NM_001134665.1 | CCCACAGACAAAGCCTGTGAAA<br>GTGCTTCTCATGACAATCAGTCT<br>GTCAGGATGGAGGAAGGTGGAT<br>CGGACAGTGATTCCAGTGAGGA<br>GGAATATAGCA   | 84 | 83 | 383028;<br>283028       | Monogenic<br>diabetes gene               |
| <i>TSPAN8</i>   | NM_004616.2    | CTGGCTATGTGGTATCTTGATCC<br>TAGCATTAGCAATATGGGTACG<br>AGTAAGCAATGACTCTCAAGCA<br>ATTTTTGGTTCTGAAGATGTAGG<br>CTCTAGCTCC   | 79 | 79 | 317600;<br>217600       | T2D gene                                 |
| <i>UBE2E2</i>   | NM_152653.3    | GTGAAAGTGTTCAAGCAAGAACC<br>AGAAAGAGAACAAGTTCAGCCC<br>AAGAAAAAGGAGGGAAAAATAT<br>CCAGCAAACCGCTGCTAAATT<br>GTCAACTAGTGC   | 84 | 83 | 368035;<br>268035       | T2D gene                                 |
| <i>VCP</i>      | NM_007126.3    | AGATGGATCTCATTGACCTAGA<br>GGATGAGACCATTGATGCCGAG<br>GTCATGAACTCTCTAGCAGTTAC<br>TATGGATGACTTCCGGTGGGCC<br>TTGAGCCAGAG   | 85 | 87 | 300093533;<br>200093533 | Housekeeping<br>gene                     |
| <i>VPS26A</i>   | NM_004896.3    | TGGCACTTTGATAAAATGGTCA<br>GGAACCAACTTTACTGGCAAAA<br>GGGTCCATGTACCACCATGTGC<br>TGGAGCATCTGTTCTACATGTG<br>GATATCTATGAA   | 84 | 81 | 300039091;<br>200039091 | T2D gene                                 |
| <i>VPS29</i>    | NM_016226.4    | AGTGGTCACCTATGTGTATCAG<br>CTAATTGGAGATGATGTGAAAG<br>TAGAACGAATCGAATACAAAAA<br>CCTTAAAGCCAGGCCTGTCTTG<br>ATGATTTTTGG    | 81 | 76 | 300093535;<br>200093535 | Housekeeping<br>gene                     |
| <i>WFS1</i>     | NM_006005.3    | GTCAGCAACCTCACCATCGACT<br>TCTCGCCTTCTTCATCCCCTG<br>GTCATCTTCTACCTGTCCTTCAT<br>CTCCATGGTGATCTGCACCCTC<br>AAGGTGTTCC     | 80 | 81 | 326714;<br>226714       | T2D gene &<br>Monogenic<br>diabetes gene |
| <i>ZBED3</i>    | NM_032367.2    | GGGCTGGGAACCCGAACCTGG<br>TGACTTTGAAAGGATAGAGCTT<br>CATTCCATACCAAAGACTTATCA<br>CACCATGTGCCTATACACCAG<br>CAGCCCAAGGTG    | 83 | 83 | 349968;<br>249968       | T2D gene                                 |
| <i>ZFAND3</i>   | NM_021943.2    | ACAGCCAGACGATGATTCCGCT<br>CCAAGTACAAGTAACAGCCAAT<br>CAGATTTGTTTTCCGAAGAGAC<br>CACCAGTGACAACAACAATACC<br>TCGATAACCAG    | 84 | 83 | 343067;<br>243067       | T2D gene                                 |
| <i>ZFAND6</i>   | NM_001242919.1 | AAGTGCCTATGCTTTGTTCCACT<br>GGCTGTGGATTTTATGGAAACC<br>CTCGTACAAATGGCATGTGTTT<br>AGTATGCTATAAAGAACATCTTC<br>AAAGACAGAA   | 79 | 78 | 363380;<br>263380       | T2D gene                                 |
| <i>ZMIZ1</i>    | NM_020338.3    | CCACGGTCAACATGGGGCAGTA<br>TTACAAGCCAGAACAGTTTAATG<br>GACAAAATAACACGTTCTCGGG<br>AAGCAGCTACAGTAACTACAGC<br>CAAGGGAATGT   | 84 | 83 | 300048334;<br>200048334 | T2D gene                                 |

**CP**, capture probe; **RP**, reporter probe; **PN (CP;RP)**, NanoString part number for the probe pair; **T<sub>m</sub>**, melting temperature.

**Table B. List of deregulated genes emphasized by the decreased expression of *PRCI* in EndoC- $\beta$ H1 cells, within the network related to apoptosis.**

| Gene            | Log2 Fold Change | Standard Error | P-Value  |
|-----------------|------------------|----------------|----------|
| <i>AAMDC</i>    | 0.52             | 0.23           | 0.026521 |
| <i>AATK</i>     | 0.45             | 0.23           | 0.048149 |
| <i>ABCA1</i>    | -0.73            | 0.26           | 0.004842 |
| <i>ABCG1</i>    | -0.42            | 0.21           | 0.047317 |
| <i>ACVR1C</i>   | -0.69            | 0.24           | 0.003253 |
| <i>ADM</i>      | 0.68             | 0.25           | 0.005929 |
| <i>AES</i>      | 0.44             | 0.21           | 0.03579  |
| <i>AGAP2</i>    | 0.57             | 0.25           | 0.020592 |
| <i>AGER</i>     | 0.70             | 0.23           | 0.002415 |
| <i>AKT3</i>     | -0.46            | 0.19           | 0.017728 |
| <i>ANO6</i>     | -0.46            | 0.20           | 0.019754 |
| <i>ANTXR1</i>   | -0.62            | 0.25           | 0.013917 |
| <i>ANXA2</i>    | 0.69             | 0.25           | 0.006579 |
| <i>APH1B</i>    | -0.45            | 0.20           | 0.023689 |
| <i>AQP3</i>     | 0.81             | 0.22           | 0.000178 |
| <i>ARAF</i>     | 0.44             | 0.21           | 0.034539 |
| <i>ARC</i>      | 0.68             | 0.27           | 0.010949 |
| <i>ARHGDI A</i> | 0.74             | 0.22           | 0.000681 |
| <i>ARHGDI B</i> | 0.72             | 0.27           | 0.007243 |
| <i>ARSB</i>     | -0.59            | 0.21           | 0.004996 |
| <i>ASCL1</i>    | -0.69            | 0.25           | 0.005143 |
| <i>ASIC1</i>    | -0.55            | 0.21           | 0.008409 |
| <i>ASTN1</i>    | -0.53            | 0.26           | 0.041322 |
| <i>ATAD3A</i>   | 0.67             | 0.25           | 0.00736  |
| <i>ATP1A2</i>   | -0.66            | 0.26           | 0.010295 |
| <i>ATP2B4</i>   | -0.65            | 0.20           | 0.001412 |
| <i>AURKA</i>    | 0.40             | 0.20           | 0.04257  |
| <i>AURKB</i>    | 0.63             | 0.22           | 0.004344 |
| <i>BAD</i>      | 0.65             | 0.24           | 0.007457 |
| <i>BCL2L12</i>  | 0.53             | 0.25           | 0.031085 |
| <i>BIRC5</i>    | 0.55             | 0.20           | 0.004569 |
| <i>BMP5</i>     | -0.48            | 0.22           | 0.025444 |
| <i>BOK</i>      | 0.47             | 0.23           | 0.044972 |
| <i>BRMS1</i>    | 0.57             | 0.22           | 0.009569 |
| <i>CAPRIN1</i>  | -0.39            | 0.20           | 0.049352 |
| <i>CASR</i>     | -0.45            | 0.22           | 0.04326  |
| <i>CAV1</i>     | 0.55             | 0.26           | 0.038241 |
| <i>CCDC47</i>   | -0.40            | 0.20           | 0.044883 |
| <i>CCNG1</i>    | -0.44            | 0.21           | 0.041519 |
| <i>CDC20</i>    | 0.55             | 0.21           | 0.008527 |
| <i>CDC25B</i>   | 0.49             | 0.21           | 0.022689 |
| <i>CDK3</i>     | 0.60             | 0.23           | 0.0087   |
| <i>CDKN2D</i>   | 0.66             | 0.21           | 0.001588 |
| <i>CDKN3</i>    | 0.44             | 0.20           | 0.030734 |
| <i>CERS6</i>    | -0.51            | 0.21           | 0.014281 |
| <i>CHTF18</i>   | 0.93             | 0.23           | 7.5E-05  |
| <i>COX8A</i>    | 0.49             | 0.22           | 0.027924 |
| <i>CRABP2</i>   | 0.54             | 0.27           | 0.047503 |
| <i>CTGF</i>     | 0.82             | 0.26           | 0.001622 |
| <i>DDAH2</i>    | 0.93             | 0.23           | 5.88E-05 |
| <i>DKK3</i>     | -0.59            | 0.21           | 0.005361 |
| <i>DLL1</i>     | 0.69             | 0.23           | 0.002325 |
| <i>DOT1L</i>    | 0.43             | 0.21           | 0.037789 |
| <i>DPM3</i>     | 0.67             | 0.26           | 0.011948 |
| <i>DPP4</i>     | 0.49             | 0.20           | 0.013016 |
| <i>DUSP6</i>    | 1.05             | 0.26           | 4.82E-05 |
| <i>DVL1</i>     | 0.53             | 0.24           | 0.026796 |



|                   |       |      |          |
|-------------------|-------|------|----------|
| <i>E4F1</i>       | 0.52  | 0.21 | 0.014491 |
| <i>EEF1D</i>      | 0.58  | 0.24 | 0.013565 |
| <i>EMD</i>        | 0.43  | 0.21 | 0.042982 |
| <i>EPHA4</i>      | -0.57 | 0.20 | 0.004588 |
| <i>ERF</i>        | 0.47  | 0.21 | 0.027617 |
| <i>ETS1</i>       | -0.50 | 0.20 | 0.013281 |
| <i>ETV5</i>       | 1.02  | 0.22 | 2.47E-06 |
| <i>FABP1</i>      | 0.42  | 0.20 | 0.039304 |
| <i>FAIM2</i>      | -0.80 | 0.26 | 0.002387 |
| <i>FAU</i>        | 0.51  | 0.24 | 0.03122  |
| <i>FBLIM1</i>     | 0.60  | 0.21 | 0.005009 |
| <i>FBXO32</i>     | -0.54 | 0.24 | 0.02366  |
| <i>FDXR</i>       | 0.46  | 0.23 | 0.048941 |
| <i>FKBP8</i>      | 0.51  | 0.23 | 0.027115 |
| <i>FN1</i>        | -0.82 | 0.22 | 0.000224 |
| <i>GADD45B</i>    | 0.54  | 0.25 | 0.027072 |
| <i>GADD45GIP1</i> | 0.59  | 0.25 | 0.018306 |
| <i>GAL</i>        | 2.05  | 0.27 | 3.14E-14 |
| <i>GJC1</i>       | -0.48 | 0.22 | 0.028607 |
| <i>GJD2</i>       | -0.49 | 0.22 | 0.029174 |
| <i>GLI1</i>       | 0.49  | 0.20 | 0.012469 |
| <i>GLI3</i>       | 0.54  | 0.27 | 0.041923 |
| <i>GLIS2</i>      | 0.53  | 0.20 | 0.007872 |
| <i>GLTSCR2</i>    | 0.53  | 0.24 | 0.025619 |
| <i>GMDS</i>       | 0.41  | 0.21 | 0.048503 |
| <i>GREM1</i>      | -0.40 | 0.21 | 0.049667 |
| <i>H2AFX</i>      | 0.92  | 0.25 | 0.00023  |
| <i>HES1</i>       | 0.57  | 0.27 | 0.032923 |
| <i>HEY1</i>       | 0.71  | 0.23 | 0.001658 |
| <i>HIC1</i>       | 0.55  | 0.23 | 0.019566 |
| <i>HIP1</i>       | -0.61 | 0.24 | 0.01004  |
| <i>HIP1R</i>      | 0.43  | 0.21 | 0.041477 |
| <i>HIPK1</i>      | -0.79 | 0.22 | 0.000272 |
| <i>HIST1H1C</i>   | 0.50  | 0.24 | 0.035005 |
| <i>HLA-G</i>      | -0.54 | 0.26 | 0.039708 |
| <i>HMGA2</i>      | 0.87  | 0.25 | 0.000585 |
| <i>HMGCR</i>      | -0.46 | 0.21 | 0.026645 |
| <i>HMGN5</i>      | 0.57  | 0.25 | 0.020766 |
| <i>HRAS</i>       | 0.58  | 0.24 | 0.014624 |
| <i>HSPA1A</i>     | 0.57  | 0.24 | 0.016413 |
| <i>HSPA1B</i>     | 0.56  | 0.24 | 0.019072 |
| <i>IAPP</i>       | 0.67  | 0.25 | 0.006894 |
| <i>IER3</i>       | 0.84  | 0.22 | 0.000131 |
| <i>IGF2</i>       | 0.59  | 0.20 | 0.002566 |
| <i>IGFBP3</i>     | 0.95  | 0.24 | 5.24E-05 |
| <i>IGFBP5</i>     | -0.52 | 0.25 | 0.038864 |
| <i>IL6R</i>       | -0.58 | 0.21 | 0.005117 |
| <i>INPP5E</i>     | 0.53  | 0.24 | 0.02983  |
| <i>IRF3</i>       | 0.58  | 0.24 | 0.014547 |
| <i>IRF7</i>       | 0.69  | 0.26 | 0.008565 |
| <i>ITGB1</i>      | -0.47 | 0.24 | 0.045799 |
| <i>JMY</i>        | -0.47 | 0.20 | 0.017757 |
| <i>JUNB</i>       | 0.83  | 0.22 | 0.000179 |
| <i>KCNJ11</i>     | 0.45  | 0.20 | 0.025037 |
| <i>KRT18</i>      | 0.73  | 0.21 | 0.000496 |
| <i>KRT8</i>       | 0.73  | 0.23 | 0.001301 |
| <i>LAG3</i>       | 0.54  | 0.27 | 0.047092 |
| <i>LEPR</i>       | -0.49 | 0.24 | 0.039331 |
| <i>LHX4</i>       | -0.60 | 0.22 | 0.007397 |
| <i>LMNA</i>       | 0.47  | 0.20 | 0.021663 |
| <i>LRP6</i>       | -0.42 | 0.22 | 0.049416 |

|                 |       |      |          |
|-----------------|-------|------|----------|
| <i>LYPLA1</i>   | -0.41 | 0.21 | 0.046869 |
| <i>LYPLA2</i>   | 0.53  | 0.23 | 0.023191 |
| <i>MAP1LC3A</i> | 0.48  | 0.23 | 0.03904  |
| <i>MAP1S</i>    | 0.56  | 0.22 | 0.012016 |
| <i>MAP3K10</i>  | 0.49  | 0.22 | 0.0239   |
| <i>MAP4K1</i>   | 0.55  | 0.27 | 0.040423 |
| <i>MAPK11</i>   | 0.53  | 0.21 | 0.013492 |
| <i>MAPK12</i>   | 0.49  | 0.23 | 0.031358 |
| <i>MAPK7</i>    | 0.46  | 0.21 | 0.026399 |
| <i>MAPT</i>     | -0.50 | 0.22 | 0.026513 |
| <i>MC1R</i>     | 0.62  | 0.23 | 0.007596 |
| <i>MET</i>      | -0.56 | 0.21 | 0.008706 |
| <i>MICAL1</i>   | 0.51  | 0.22 | 0.020053 |
| <i>MIF</i>      | 0.73  | 0.26 | 0.00422  |
| <i>MME</i>      | -0.46 | 0.20 | 0.020296 |
| <i>MMP2</i>     | -0.48 | 0.22 | 0.032016 |
| <i>MPG</i>      | 0.82  | 0.24 | 0.000518 |
| <i>MRPL41</i>   | 0.57  | 0.27 | 0.030625 |
| <i>MSH6</i>     | -0.49 | 0.19 | 0.011544 |
| <i>MYBL2</i>    | 0.63  | 0.21 | 0.00238  |
| <i>MYC</i>      | 0.97  | 0.27 | 0.000287 |
| <i>NAA38</i>    | 0.62  | 0.24 | 0.010331 |
| <i>NDRG1</i>    | -0.41 | 0.20 | 0.040641 |
| <i>NDUFA13</i>  | 0.62  | 0.22 | 0.004797 |
| <i>NFKBID</i>   | 0.62  | 0.23 | 0.006925 |
| <i>NINJ1</i>    | 0.51  | 0.23 | 0.027097 |
| <i>NME3</i>     | 0.79  | 0.26 | 0.002277 |
| <i>NME4</i>     | 0.45  | 0.20 | 0.026162 |
| <i>NQO1</i>     | 0.56  | 0.22 | 0.008878 |
| <i>NR0B2</i>    | 0.91  | 0.22 | 3.14E-05 |
| <i>NR1H2</i>    | 0.61  | 0.24 | 0.009835 |
| <i>NRGN</i>     | 0.65  | 0.23 | 0.00515  |
| <i>NUDT1</i>    | 0.66  | 0.25 | 0.008246 |
| <i>NUF2</i>     | 0.59  | 0.20 | 0.002504 |
| <i>OSGIN1</i>   | 0.65  | 0.25 | 0.008131 |
| <i>PAFAH1B3</i> | 0.48  | 0.22 | 0.030455 |
| <i>PAM16</i>    | 0.44  | 0.22 | 0.040561 |
| <i>PCSK2</i>    | -0.41 | 0.19 | 0.033134 |
| <i>PDE5A</i>    | -0.40 | 0.20 | 0.043578 |
| <i>PDLIM7</i>   | 0.58  | 0.22 | 0.008612 |
| <i>PHLDA1</i>   | 0.63  | 0.24 | 0.009764 |
| <i>PIDD1</i>    | 0.63  | 0.26 | 0.01402  |
| <i>PIM3</i>     | 0.75  | 0.23 | 0.001312 |
| <i>PLCE1</i>    | -0.42 | 0.21 | 0.042433 |
| <i>PLK1</i>     | 0.50  | 0.19 | 0.00978  |
| <i>PLK3</i>     | 0.65  | 0.22 | 0.003874 |
| <i>POMC</i>     | 0.59  | 0.25 | 0.01925  |
| <i>POU3F1</i>   | 0.55  | 0.27 | 0.043455 |
| <i>PPARA</i>    | -0.43 | 0.20 | 0.035315 |
| <i>PQBP1</i>    | 0.52  | 0.21 | 0.013244 |
| <i>PRKCB</i>    | 2.19  | 0.27 | 6.11E-16 |
| <i>PRR13</i>    | 0.49  | 0.21 | 0.01766  |
| <i>PRR7</i>     | 0.53  | 0.27 | 0.047617 |
| <i>PSEN1</i>    | -0.39 | 0.19 | 0.044557 |
| <i>PTPRZ1</i>   | -0.50 | 0.22 | 0.025283 |
| <i>PTTG1</i>    | 0.56  | 0.20 | 0.006187 |
| <i>RAC3</i>     | 0.60  | 0.25 | 0.015065 |
| <i>RAD9A</i>    | 0.69  | 0.24 | 0.003309 |
| <i>RB1</i>      | -0.49 | 0.21 | 0.019312 |
| <i>RBCK1</i>    | 0.54  | 0.23 | 0.018173 |
| <i>RBPJ</i>     | -0.60 | 0.19 | 0.001993 |

|                  |       |      |          |
|------------------|-------|------|----------|
| <i>RHOC</i>      | 0.53  | 0.21 | 0.012576 |
| <i>ROR1</i>      | -0.67 | 0.24 | 0.005216 |
| <i>RPRM</i>      | 0.52  | 0.26 | 0.047254 |
| <i>RPS19</i>     | 0.49  | 0.23 | 0.034511 |
| <i>RPS6KA5</i>   | -0.48 | 0.22 | 0.030225 |
| <i>RTN4R</i>     | 0.61  | 0.27 | 0.021813 |
| <i>RUVBL2</i>    | 0.48  | 0.23 | 0.036673 |
| <i>S100A11</i>   | 0.66  | 0.26 | 0.010635 |
| <i>S100A6</i>    | 0.55  | 0.24 | 0.024644 |
| <i>S1PR3</i>     | -0.63 | 0.26 | 0.016902 |
| <i>SAT1</i>      | 0.63  | 0.20 | 0.001506 |
| <i>SATB1</i>     | -0.48 | 0.21 | 0.026124 |
| <i>SCN3B</i>     | -0.43 | 0.19 | 0.02628  |
| <i>SDF2L1</i>    | 0.73  | 0.25 | 0.00364  |
| <i>SIRT6</i>     | 0.59  | 0.24 | 0.012135 |
| <i>SLC18A3</i>   | 0.64  | 0.26 | 0.012553 |
| <i>SLC2A1</i>    | -0.39 | 0.19 | 0.041783 |
| <i>SLC39A10</i>  | -0.46 | 0.20 | 0.01861  |
| <i>SLC39A6</i>   | -0.44 | 0.22 | 0.048108 |
| <i>SLC6A6</i>    | -0.45 | 0.20 | 0.02347  |
| <i>SMAD5</i>     | -0.57 | 0.21 | 0.005689 |
| <i>SOX5</i>      | -0.90 | 0.22 | 3.79E-05 |
| <i>SPOCK1</i>    | -0.45 | 0.21 | 0.038062 |
| <i>SST</i>       | 1.30  | 0.21 | 3.35E-10 |
| <i>SSTR2</i>     | -0.62 | 0.19 | 0.001131 |
| <i>ST3GAL1</i>   | -0.52 | 0.26 | 0.044856 |
| <i>ST6GAL1</i>   | -0.67 | 0.19 | 0.000472 |
| <i>STC1</i>      | 0.62  | 0.26 | 0.017674 |
| <i>STUB1</i>     | 0.49  | 0.22 | 0.024207 |
| <i>SULF1</i>     | -0.76 | 0.21 | 0.000259 |
| <i>TACC3</i>     | 0.67  | 0.22 | 0.002058 |
| <i>TCF4</i>      | -0.54 | 0.20 | 0.008119 |
| <i>TEX11</i>     | -0.50 | 0.20 | 0.013485 |
| <i>TFDP2</i>     | -0.40 | 0.19 | 0.042089 |
| <i>TFPT</i>      | 0.49  | 0.23 | 0.034336 |
| <i>THBD</i>      | -0.58 | 0.25 | 0.021691 |
| <i>TIAM1</i>     | -0.43 | 0.20 | 0.03475  |
| <i>TIMP3</i>     | -0.62 | 0.22 | 0.004322 |
| <i>TK1</i>       | 0.59  | 0.23 | 0.010718 |
| <i>TMBIM6</i>    | -0.41 | 0.19 | 0.031823 |
| <i>TMEFF2</i>    | -0.64 | 0.23 | 0.005074 |
| <i>TNFAIP2</i>   | 0.52  | 0.24 | 0.031759 |
| <i>TNFAIP8L1</i> | 0.57  | 0.23 | 0.013299 |
| <i>TNFRSF11B</i> | 0.71  | 0.25 | 0.004933 |
| <i>TNFRSF12A</i> | 0.68  | 0.22 | 0.001925 |
| <i>TNFRSF6B</i>  | 0.66  | 0.27 | 0.012419 |
| <i>TNNI3</i>     | 0.57  | 0.27 | 0.032266 |
| <i>TP53I3</i>    | 0.47  | 0.21 | 0.025102 |
| <i>TREX2</i>     | 0.53  | 0.25 | 0.033846 |
| <i>TRIM32</i>    | -0.50 | 0.20 | 0.012077 |
| <i>UGT8</i>      | -0.95 | 0.19 | 1.11E-06 |
| <i>VCAN</i>      | 0.61  | 0.27 | 0.022184 |
| <i>VCL</i>       | -0.52 | 0.19 | 0.006984 |
| <i>WNT5A</i>     | -0.61 | 0.20 | 0.002646 |
| <i>ZBED6</i>     | -0.53 | 0.25 | 0.035941 |
| <i>ZBTB17</i>    | 0.48  | 0.22 | 0.030132 |
| <i>ZFP36</i>     | 0.81  | 0.21 | 0.000108 |
